# Supplementary material for: Modelling of Oblique Wire Cutting and Experimental Application on Soft Solid Foods for the Investigation of Friction Behaviour
Source: Hindawi journal article supplement (doi:10.1155/2019/5429093), 2019-06-16
Supplement: f1 [file 5429093.f1.zip]

Archive with 7 entries (7 files):
- Dataset_oblique_wire_cutting_of_soft_solid_foods.csv
- V1_Edam_Cheese_d_Wire=0.06mm_v_feed=1mm_s.avi
- V2_Edam_Cheese_d_Wire=0.20mm_v_feed=2mm_s.avi
- V3_Leberkaese_d_Wire=0.06mm_v_feed=1mm_s.avi
- V4_Leberkaese_d_Wire=0.20mm_v_feed=2mm_s.avi
- V5_Bubblegum1_d_Wire=0.06mm_v_feed=1mm_s.avi
- V6_Bubblegum1_d_Wire=0.20mm_v_feed=2mm_s.avi
