# Supplementary material for: Modelling of Oblique Wire Cutting and Experimental Application on Soft Solid Foods for the Investigation of Friction Behaviour
Source: Hindawi journal article supplement (doi:10.1155/2019/5429093), 2019-06-16
Supplement: f1 [file 5429093.f1.zip › Dataset_oblique_wire_cutting_of_soft_solid_foods.csv]

Material	Angle_lambda_deg	Wire_diameter_mm	Speed_mm/s	Repetition_Nr	R_MD	R_CD	R_MD_Error	R_CD_Error
Bubble_Gum_1	0	0.06	2.0	1	165.177516734072	-474.2580691880438	0.5370994806364394	0.016621501627920404
Bubble_Gum_1	0	0.06	2.0	2	170.14670335564426	-102.00304502541066	0.5554229180227505	0.018868776251046826
Bubble_Gum_1	0	0.06	2.0	3	168.136503454175	45.152624103673	0.5312215071336005	0.01277837804691064
Bubble_Gum_1	0	0.06	2.0	4	163.25138597364239	-16.96212565339509	0.5328656679352058	0.022312700329792996
Bubble_Gum_1	0	0.06	2.0	5	165.6497232310006	341.84433652335406	0.5379734229581731	0.014677802546443578
Bubble_Gum_1	0	0.06	2.0	6	163.0572072467602	757.5186425278999	0.5303067213034668	0.026509824262281455
Bubble_Gum_1	0	0.06	2.0	7	168.18586181322405	22.076831508299946	0.5365566583065027	0.012820033559293963
Bubble_Gum_1	0	0.06	2.0	8	165.6829030446754	158.06866707985407	0.5344541885297529	0.015334958830126148
Bubble_Gum_1	0	0.06	2.0	9	164.34550253789416	664.1492525758488	0.5290703682542598	0.026622750300548004
Bubble_Gum_1	0	0.06	2.0	10	164.38274390492026	152.8473508704212	0.5364975007304826	0.014197327461801782
Bubble_Gum_1	0	0.06	1.0	1	114.12948230983096	81.93762619526153	0.3099318670033219	0.01085536526019788
Bubble_Gum_1	0	0.06	1.0	2	113.10786989392207	692.1016251497863	0.30343998938716105	0.015885958973870372
Bubble_Gum_1	0	0.06	1.0	3	111.63853719216645	-169.4166587115368	0.2975118173352012	0.0109628448655351
Bubble_Gum_1	0	0.06	1.0	4	110.32989131883903	-204.73151488425307	0.2979946017422967	0.012170229588972176
Bubble_Gum_1	0	0.06	1.0	5	110.54448509870217	260.4525659580343	0.29378869716128986	0.01303902899716118
Bubble_Gum_1	0	0.06	1.0	6	111.16642418092472	286.5907366724415	0.2888359129752586	0.01111334139395323
Bubble_Gum_1	0	0.06	1.0	7	109.58459249236179	-249.05228894404	0.2872384277361723	0.0098580342131661
Bubble_Gum_1	0	0.06	1.0	8	113.29221487203226	57.95372112171603	0.29674496354346475	0.010354207576991457
Bubble_Gum_1	0	0.06	1.0	9	112.60674523367342	341.85870449890933	0.3317863081313799	0.013457140039511371
Bubble_Gum_1	0	0.06	1.0	10	116.38372069950479	36.32294322052538	0.3021287157789994	0.012997451435761791
Bubble_Gum_1	0	0.1	2.0	1	179.57086893834304	1270.3655074586459	0.5205989778981963	0.014144483474170752
Bubble_Gum_1	0	0.1	2.0	2	172.56668672485054	249.3399495052913	0.478413046781546	0.017878550716922115
Bubble_Gum_1	0	0.1	2.0	3	179.07876532474666	865.7022077373402	0.5185354362550906	0.014779417710394632
Bubble_Gum_1	0	0.1	2.0	4	179.3714363175638	560.8295395771256	0.5098302696748995	0.02155257335765874
Bubble_Gum_1	0	0.1	2.0	5	184.6767437443197	862.922833770036	0.5218301172030803	0.016072576552258726
Bubble_Gum_1	0	0.1	2.0	6	181.8314258983496	675.4458666761748	0.5219758038032598	0.02115422041259943
Bubble_Gum_1	0	0.1	2.0	7	175.32865703737554	320.716540733057	0.4915611863239659	0.01648775141747176
Bubble_Gum_1	0	0.1	2.0	8	182.00151919935314	1220.609029648302	0.5159468744928176	0.020519037911902998
Bubble_Gum_1	0	0.1	2.0	9	184.2002036499117	856.1322762540016	0.5333891299428993	0.01820740094724257
Bubble_Gum_1	0	0.1	2.0	10	185.4602719100349	355.3888215157481	0.5122543062990054	0.015487169536316434
Bubble_Gum_1	0	0.1	1.0	1	127.60288497090706	-373.6888457921053	0.2811911094874933	0.013561043076823305
Bubble_Gum_1	0	0.1	1.0	2	128.24961764117714	-77.60895781332522	0.2801567891755518	0.01633962738240291
Bubble_Gum_1	0	0.1	1.0	3	126.38055002829934	59.490222045828304	0.2796456516614441	0.015722030631636876
Bubble_Gum_1	0	0.1	1.0	4	127.94990722777803	147.64062925619004	0.2809270737536634	0.015675125389136686
Bubble_Gum_1	0	0.1	1.0	5	125.07773103714997	171.37139673356407	0.26948015287794314	0.01321327599926362
Bubble_Gum_1	0	0.1	1.0	6	128.18069014533606	-23.729016421798377	0.29067777443158777	0.018177312995832827
Bubble_Gum_1	0	0.1	1.0	7	125.886816115964	-194.6516931608196	0.274467846907653	0.0183770976388464
Bubble_Gum_1	0	0.1	1.0	8	126.26714013022655	291.1198307871928	0.27002236416723635	0.011491270268803859
Bubble_Gum_1	0	0.1	1.0	9	128.6896127218664	-66.60396545699854	0.27098978157709225	0.012831237669090044
Bubble_Gum_1	0	0.1	1.0	10	130.73835253113805	46.300670349237286	0.2876204936151752	0.01402625376041597
Bubble_Gum_1	0	0.2	2.0	1	213.89468331831242	719.5457966118283	0.6758836174339974	0.02732874038604843
Bubble_Gum_1	0	0.2	2.0	2	205.7698784517712	1317.3087946639039	0.7277036959391243	0.02103142218889827
Bubble_Gum_1	0	0.2	2.0	3	204.85024544879448	193.58182228223407	0.7312165683690558	0.03372063430225592
Bubble_Gum_1	0	0.2	2.0	4	207.60666456180505	585.8167105760804	0.7254273489174777	0.025759500109281127
Bubble_Gum_1	0	0.2	2.0	5	204.2897025539645	726.5592311771898	0.7349756148316016	0.02827347366490616
Bubble_Gum_1	0	0.2	2.0	6	202.08795290440065	741.6547536090068	0.7407053674493216	0.021912203144958647
Bubble_Gum_1	0	0.2	2.0	7	196.35377753800046	1156.9428160664527	0.6859050295595902	0.02501368927237436
Bubble_Gum_1	0	0.2	2.0	8	201.91613017601546	50.63114086416473	0.7296591053499257	0.02748258961122813
Bubble_Gum_1	0	0.2	2.0	9	204.62565316870075	1477.7384231946317	0.7378463542304761	0.025973692350515217
Bubble_Gum_1	0	0.2	2.0	10	211.46874618025714	743.8095071284043	0.7551323366835935	0.029323895507302074
Bubble_Gum_1	0	0.2	1.0	1	143.2559934366926	616.6737516984213	0.39175198165324737	0.014467306261200718
Bubble_Gum_1	0	0.2	1.0	2	140.8220782632051	581.5584888621576	0.38672748283434377	0.014445123794968604
Bubble_Gum_1	0	0.2	1.0	3	143.38384558615658	149.86386095705376	0.4109213022239191	0.011854185435851452
Bubble_Gum_1	0	0.2	1.0	4	141.30220484674788	452.72218254488104	0.392797233273175	0.011002304085301302
Bubble_Gum_1	0	0.2	1.0	5	141.53081855171686	89.5445896903164	0.4235394985240776	0.017771223914221018
Bubble_Gum_1	0	0.2	1.0	6	146.721554771458	-11.0192712240873	0.4033006934709239	0.013190466427690829
Bubble_Gum_1	0	0.2	1.0	7	144.83935264042168	915.4876546187016	0.4210918912365916	0.021121945290054612
Bubble_Gum_1	0	0.2	1.0	8	140.16359603817185	272.3406605408402	0.4088319613541207	0.01636945230903009
Bubble_Gum_1	0	0.2	1.0	9	148.64771897395644	224.75790334791907	0.4227193031078365	0.01637043704854672
Bubble_Gum_1	0	0.2	1.0	10	145.1324896849697	221.3813171809525	0.42326359085569604	0.009554863262621976
Bubble_Gum_1	0	0.4	2.0	1	263.6341200940238	2175.6100805406213	0.7333382193880298	0.03932600853483843
Bubble_Gum_1	0	0.4	2.0	2	266.14256043447114	2483.234970793858	0.7161988489427829	0.027823129654246333
Bubble_Gum_1	0	0.4	2.0	3	255.28225070370326	1010.9798680719056	0.7099733849746518	0.044409240104501715
Bubble_Gum_1	0	0.4	2.0	4	241.4715240234111	2583.672043058304	0.7099788036430896	0.031249560945890664
Bubble_Gum_1	0	0.4	2.0	5	252.94546025109986	922.7642618703992	0.7164729781403523	0.05307722086861807
Bubble_Gum_1	0	0.4	2.0	6	243.12013325425295	1026.1045714980735	0.715488306864453	0.0397588895737844
Bubble_Gum_1	0	0.4	2.0	7	252.88440442460126	1916.2463175234093	0.7035193701361789	0.02720549654699846
Bubble_Gum_1	0	0.4	2.0	8	250.8399619280484	2343.542715109076	0.678305163963792	0.0454772562617385
Bubble_Gum_1	0	0.4	2.0	9	262.8808395754665	2756.555830770726	0.7192353065589602	0.03805526303275356
Bubble_Gum_1	0	0.4	2.0	10	250.9741843234341	1617.2488358546263	0.694290500480243	0.02775982751840413
Bubble_Gum_1	0	0.4	1.0	1	186.612452833941	1136.0612611496408	0.4036831358174592	0.018524477491953042
Bubble_Gum_1	0	0.4	1.0	2	184.78323566955467	711.0561545147574	0.3954028771560199	0.01569593149762613
Bubble_Gum_1	0	0.4	1.0	3	185.55755703718853	1853.7377088983594	0.41314083060398293	0.02164598858215718
Bubble_Gum_1	0	0.4	1.0	4	185.69934832144372	942.7952747709949	0.41202157035196507	0.012426422747729966
Bubble_Gum_1	0	0.4	1.0	5	183.88644674927733	504.46063754069735	0.4049857201270744	0.015593980493673078
Bubble_Gum_1	0	0.4	1.0	6	178.61360476076834	853.6084341633714	0.38158184491271	0.023197306574404792
Bubble_Gum_1	0	0.4	1.0	7	182.37607210341105	179.15691397675633	0.3970051661007304	0.0264456823175638
Bubble_Gum_1	0	0.4	1.0	8	185.08803889008215	735.2154431811877	0.3767141352712042	0.016017184380955472
Bubble_Gum_1	0	0.4	1.0	9	188.90537644334196	1485.6753062081077	0.4227159356329985	0.026441470147570152
Bubble_Gum_1	0	0.4	1.0	10	186.2662011503957	728.5027878334496	0.3898625260982775	0.016788171963290802
Bubble_Gum_1	30	0.06	2.0	1	180.72748020155072	88.71425440062762	0.332927394565334	0.1646254447287193
Bubble_Gum_1	30	0.06	2.0	2	180.08677380947358	91.87260702328247	0.3617501252458487	0.1591769575276567
Bubble_Gum_1	30	0.06	2.0	3	180.81515171918102	92.4117426478132	0.3478546143330272	0.1573374711425564
Bubble_Gum_1	30	0.06	2.0	4	187.02784922250405	96.80900619090175	0.2823758875582651	0.13634857459590488
Bubble_Gum_1	30	0.06	2.0	5	182.34762097792233	93.6675766495808	0.3223203918054096	0.1488460451358983
Bubble_Gum_1	30	0.06	2.0	6	181.54758228035374	93.2965430111932	0.31857125782992896	0.14299374802368284
Bubble_Gum_1	30	0.06	2.0	7	189.62917593573164	97.78714340357709	0.2802679227611945	0.14117079805108662
Bubble_Gum_1	30	0.06	2.0	8	175.72030956558166	90.74821173403937	0.3371596060741464	0.14882784474355554
Bubble_Gum_1	30	0.06	2.0	9	176.99117551898112	89.95567354616888	0.3132850446928342	0.1440556260799583
Bubble_Gum_1	30	0.06	2.0	10	177.7491779374834	90.3539108371316	0.3323317220751562	0.15340274933944842
Bubble_Gum_1	30	0.06	1.0	1	128.95778473095976	65.75127828488505	0.19535451637045195	0.06874048692733452
Bubble_Gum_1	30	0.06	1.0	2	129.14437542535174	66.82694554549145	0.20004113266593804	0.0795019511452367
Bubble_Gum_1	30	0.06	1.0	3	129.4614728528828	66.71176017230022	0.21008648788216114	0.08618898981906281
Bubble_Gum_1	30	0.06	1.0	4	133.87512213772982	70.76835294410657	0.15922010049989005	0.06977927013420936
Bubble_Gum_1	30	0.06	1.0	5	132.29771001122614	69.2052948610034	0.1657008382677425	0.06544376052773651
Bubble_Gum_1	30	0.06	1.0	6	131.95078901388058	70.21951572279937	0.14851162428558126	0.053323094737574205
Bubble_Gum_1	30	0.06	1.0	7	125.8721194015168	64.11854462940067	0.19416099528676872	0.08029162966123991
Bubble_Gum_1	30	0.06	1.0	8	121.25299457785033	61.933821364471456	0.18588971108833305	0.07188016701694476
Bubble_Gum_1	30	0.06	1.0	9	123.75481985965935	63.46229060957467	0.18781447538403034	0.07528071239436733
Bubble_Gum_1	30	0.06	1.0	10	120.77738404839126	60.65840087891942	0.22816556946508046	0.09261434780204936
Bubble_Gum_1	30	0.1	2.0	1	203.5100095957139	86.98156375546816	0.3544899754651808	0.16779363818170326
Bubble_Gum_1	30	0.1	2.0	2	207.58418583107317	93.23709222170052	0.30503697160766097	0.14035483996772455
Bubble_Gum_1	30	0.1	2.0	3	193.82131702992692	84.59167406698216	0.34873456253024115	0.154418506545479
Bubble_Gum_1	30	0.1	2.0	4	191.43661388794786	89.18091183683521	0.3318662521565637	0.13978521762053453
Bubble_Gum_1	30	0.1	2.0	5	192.66991032437454	88.06369155685648	0.3085198399575655	0.13925729309171475
Bubble_Gum_1	30	0.1	2.0	6	197.00073127149486	91.63825865423684	0.3030555005622642	0.13214132752210433
Bubble_Gum_1	30	0.1	2.0	7	197.84530838621924	90.5851762864044	0.3542145363351458	0.14728154482796005
Bubble_Gum_1	30	0.1	2.0	8	198.3318112568536	93.78789750876926	0.3180785526554916	0.13606695548454326
Bubble_Gum_1	30	0.1	2.0	9	200.32610553684006	94.744208861664	0.310847627933712	0.13008907589152235
Bubble_Gum_1	30	0.1	2.0	10	198.08128929207803	89.42895582548582	0.32111989296676313	0.14124250434345625
Bubble_Gum_1	30	0.1	1.0	1	136.31388722111757	64.71070069399266	0.21819022646751032	0.06779388946115728
Bubble_Gum_1	30	0.1	1.0	2	134.9934750145553	63.70301063940957	0.17865432949821458	0.05257303843339869
Bubble_Gum_1	30	0.1	1.0	3	148.35014498479214	69.07736887080029	0.19919946013948234	0.06648313244379797
Bubble_Gum_1	30	0.1	1.0	4	142.33072972762486	66.22278328829935	0.22886657990990514	0.07539773415341385
Bubble_Gum_1	30	0.1	1.0	5	143.11530432742447	66.23216375193735	0.22050947858437173	0.08005655256460169
Bubble_Gum_1	30	0.1	1.0	6	142.33345012537507	66.09914209703882	0.2406520670528533	0.08628969077152279
Bubble_Gum_1	30	0.1	1.0	7	142.71595908893437	65.90849153131471	0.21175897583292214	0.07544277748917308
Bubble_Gum_1	30	0.1	1.0	8	140.07416672623074	64.4061219319965	0.1849298794503894	0.0656474093922016
Bubble_Gum_1	30	0.1	1.0	9	143.07073665541162	67.6408767655135	0.2124737778264475	0.07505803303096296
Bubble_Gum_1	30	0.1	1.0	10	141.9814455022944	66.54354315728133	0.226809919842036	0.08101726420697455
Bubble_Gum_1	30	0.2	2.0	1	214.12170844909264	81.65630138943168	0.4941066645101113	0.1392767942360271
Bubble_Gum_1	30	0.2	2.0	2	219.15542892224389	83.75700616065193	0.4490736149830782	0.13600014589488948
Bubble_Gum_1	30	0.2	2.0	3	216.04034241924262	85.84306059990942	0.4289368580060605	0.12293690388479846
Bubble_Gum_1	30	0.2	2.0	4	217.19933591983914	84.29179153687902	0.4011964127674622	0.12763173921935175
Bubble_Gum_1	30	0.2	2.0	5	223.81123749753007	86.74358774284703	0.40670884372524896	0.12111839273103925
Bubble_Gum_1	30	0.2	2.0	6	226.36850662441785	87.67604553177677	0.4228174228715889	0.13328477340120173
Bubble_Gum_1	30	0.2	2.0	7	220.54758822962538	83.85051724327107	0.4201633082867478	0.14318119605735938
Bubble_Gum_1	30	0.2	2.0	8	227.36560270820306	91.46030063949362	0.4161424479103454	0.1225553102141639
Bubble_Gum_1	30	0.2	2.0	9	225.82534198069195	86.4983264221424	0.4007987777231479	0.12250825643687414
Bubble_Gum_1	30	0.2	2.0	10	221.7355700663215	88.42082382566375	0.4265271053274224	0.12447391488112285
Bubble_Gum_1	30	0.2	1.0	1	151.68213684390952	60.34076864942538	0.2794235229328437	0.07150555327921335
Bubble_Gum_1	30	0.2	1.0	2	151.45712078634273	60.42956548139	0.2687617713731412	0.06334090119098408
Bubble_Gum_1	30	0.2	1.0	3	151.8935943961696	59.03310588704633	0.2473207528575771	0.0647684204501952
Bubble_Gum_1	30	0.2	1.0	4	151.35718413437627	61.02430362270405	0.2667297792241732	0.06804068965026228
Bubble_Gum_1	30	0.2	1.0	5	149.88909753955136	60.20232912067155	0.2671611365656722	0.06736257928702666
Bubble_Gum_1	30	0.2	1.0	6	147.17142779115517	56.18627892407537	0.29067359159860034	0.08249456807662008
Bubble_Gum_1	30	0.2	1.0	7	150.92031451619	59.16706902778932	0.24177159565400946	0.06919032262141754
Bubble_Gum_1	30	0.2	1.0	8	151.50125653082674	60.58010390480233	0.2495994083460583	0.06280572035902852
Bubble_Gum_1	30	0.2	1.0	9	153.3906658215504	61.812164325075244	0.2613083745780249	0.0704196310378036
Bubble_Gum_1	30	0.2	1.0	10	154.61916955958625	60.525760026153016	0.24857231550620254	0.07128417434797879
Bubble_Gum_1	30	0.4	2.0	1	284.278546179809	109.79914483165444	0.5896016906042211	0.1081680562897191
Bubble_Gum_1	30	0.4	2.0	2	288.0595177142724	103.33308840012026	0.4884412286002008	0.08598047600571218
Bubble_Gum_1	30	0.4	2.0	3	281.1828190449113	104.02533806158344	0.6068798647065741	0.08593727626668217
Bubble_Gum_1	30	0.4	2.0	4	289.19646739427327	106.1507781024804	0.5327858415725247	0.07660985838156191
Bubble_Gum_1	30	0.4	2.0	5	281.45018869375775	102.57027135031623	0.5657954817801316	0.08939198442744267
Bubble_Gum_1	30	0.4	2.0	6	278.481404999384	101.94569371764317	0.577216882884418	0.10432149895336633
Bubble_Gum_1	30	0.4	2.0	7	281.5811838816344	99.16104438250366	0.5531671699312654	0.09650795955668208
Bubble_Gum_1	30	0.4	2.0	8	273.8091157705606	98.94539372464251	0.6610470304556378	0.11000487531512106
Bubble_Gum_1	30	0.4	2.0	9	283.5799949074487	104.10091270887062	0.5483114488788755	0.08698164820444469
Bubble_Gum_1	30	0.4	2.0	10	280.59537482436593	104.04195637532862	0.5904844305487116	0.09613406635961018
Bubble_Gum_1	30	0.4	1.0	1	194.71639595868567	77.95912357970613	0.34042875634364017	0.07584401503381462
Bubble_Gum_1	30	0.4	1.0	2	192.26124124697247	72.29144766019003	0.32050686205116224	0.04802944065454223
Bubble_Gum_1	30	0.4	1.0	3	190.74331749008155	76.46487795836478	0.25987457223431804	0.04496876435414695
Bubble_Gum_1	30	0.4	1.0	4	189.29638851680545	72.46116983685671	0.3569962615047064	0.06469928229790083
Bubble_Gum_1	30	0.4	1.0	5	191.46454669759154	72.73417336527321	0.3478748619142447	0.051357025964345805
Bubble_Gum_1	30	0.4	1.0	6	194.63000110643367	72.9949034707322	0.31233417859973306	0.05182252337275027
Bubble_Gum_1	30	0.4	1.0	7	183.33957046650596	67.27536694306613	0.298180827337394	0.04906461906244188
Bubble_Gum_1	30	0.4	1.0	8	188.10472942078505	71.35539151918054	0.3718443603996838	0.05801522251389176
Bubble_Gum_1	30	0.4	1.0	9	186.45852599922654	70.36315330360289	0.2975647501248355	0.05132271556108549
Bubble_Gum_1	30	0.4	1.0	10	196.68035660762988	75.25135883470288	0.33773176573231417	0.056350404824024675
Bubble_Gum_1	45	0.06	2.0	1	167.76068541309394	84.52590530018755	0.2252545795547137	0.16461420241699193
Bubble_Gum_1	45	0.06	2.0	2	166.43193411842287	82.66822562400726	0.2350202084545899	0.17408220109771871
Bubble_Gum_1	45	0.06	2.0	3	159.9474395588835	80.44852362710756	0.28632939534551904	0.1930687226615745
Bubble_Gum_1	45	0.06	2.0	4	159.44640061829634	78.90598483538015	0.313177282162394	0.20721899448452327
Bubble_Gum_1	45	0.06	2.0	5	165.55442753754846	82.09452211867307	0.2343621844327349	0.17457184317877214
Bubble_Gum_1	45	0.06	2.0	6	168.2268759374117	84.76577069927184	0.21413151714681072	0.15665440816277149
Bubble_Gum_1	45	0.06	2.0	7	162.2747871440503	81.85595755213393	0.2447744019951357	0.16946114175798555
Bubble_Gum_1	45	0.06	2.0	8	166.43952720062475	83.42176484386265	0.2446600576717402	0.17562597457154147
Bubble_Gum_1	45	0.06	2.0	9	165.53935820785833	81.97894528333683	0.2650048578895537	0.18723660474492268
Bubble_Gum_1	45	0.06	2.0	10	167.09302322573686	82.13612482613297	0.2219029185961517	0.16450227957413746
Bubble_Gum_1	45	0.06	1.0	1	108.65749286571352	52.34090149001679	0.13025787539047956	0.07785840649823401
Bubble_Gum_1	45	0.06	1.0	2	108.84411261896787	52.815059975363624	0.19501143167687715	0.11822101994025805
Bubble_Gum_1	45	0.06	1.0	3	115.343031198459	56.66953177861792	0.15262680241627313	0.09415843213640156
Bubble_Gum_1	45	0.06	1.0	4	111.47892747181122	54.32518997866308	0.1412107074855344	0.08600936441343451
Bubble_Gum_1	45	0.06	1.0	5	111.69902456486793	54.95410870051276	0.15169384416988632	0.09812739701231747
Bubble_Gum_1	45	0.06	1.0	6	114.66250053479526	57.08808656458213	0.14958774142074058	0.09231374317095158
Bubble_Gum_1	45	0.06	1.0	7	112.54930763343935	56.2741280613958	0.14314390409116848	0.08857419641015048
Bubble_Gum_1	45	0.06	1.0	8	112.97203010262555	56.070044273232284	0.1333781669783621	0.07880272022749485
Bubble_Gum_1	45	0.06	1.0	9	111.5116142887036	54.65150274802974	0.1972477930542539	0.12444160191669727
Bubble_Gum_1	45	0.06	1.0	10	111.94434901376124	54.955014626690755	0.19364089932805348	0.1194336024660585
Bubble_Gum_1	45	0.1	2.0	1	195.03511203431705	84.8722764669525	0.24470634496964405	0.20455324153120416
Bubble_Gum_1	45	0.1	2.0	2	199.70050408181336	90.45716044288584	0.2436022007747482	0.14034808828280887
Bubble_Gum_1	45	0.1	2.0	3	196.66326447218648	86.6245341954385	0.2608462011027576	0.16774574601381492
Bubble_Gum_1	45	0.1	2.0	4	202.2397873398042	90.69498350153353	0.2505014296946653	0.15488973237583228
Bubble_Gum_1	45	0.1	2.0	5	200.54359000205224	87.92500693376383	0.2545964822919409	0.15562204709766955
Bubble_Gum_1	45	0.1	2.0	6	199.42402960574267	89.11578408410534	0.2317440954989743	0.14711190969891086
Bubble_Gum_1	45	0.1	2.0	7	191.5971271049541	85.12329981237596	0.2945558971752248	0.16855237078098095
Bubble_Gum_1	45	0.1	2.0	8	194.68281144602335	86.6020994749869	0.2742771821431055	0.1693457787228117
Bubble_Gum_1	45	0.1	2.0	9	195.32957655512826	87.05802937825257	0.2704074946032097	0.15600562091075382
Bubble_Gum_1	45	0.1	2.0	10	195.16252154869676	84.57000382621914	0.26831305918124865	0.17059188840323894
Bubble_Gum_1	45	0.1	1.0	1	129.08766088217587	54.923005508309885	0.15287336880915733	0.0993887581076388
Bubble_Gum_1	45	0.1	1.0	2	131.3304006882371	55.442225569548235	0.17360838253227126	0.07742504396947562
Bubble_Gum_1	45	0.1	1.0	3	133.26535702462354	55.379848557297315	0.17005343552969887	0.08246414366386655
Bubble_Gum_1	45	0.1	1.0	4	128.128115287841	54.943429142448224	0.12205686420468725	0.05851406617961765
Bubble_Gum_1	45	0.1	1.0	5	130.54152095220195	55.24318404023895	0.1488036124489431	0.07032909491280158
Bubble_Gum_1	45	0.1	1.0	6	127.79004349053896	54.419898701915535	0.18945211998880987	0.08678247190963355
Bubble_Gum_1	45	0.1	1.0	7	129.03240129161395	53.50156215162656	0.2197352555267741	0.1077829674324505
Bubble_Gum_1	45	0.1	1.0	8	129.6192678337532	54.3382140014473	0.1749892275742165	0.07932546108832267
Bubble_Gum_1	45	0.1	1.0	9	133.73246761342742	57.18217930147758	0.1584631231035215	0.07734307127871808
Bubble_Gum_1	45	0.1	1.0	10	124.92686600205613	54.13788756491791	0.1986436782531471	0.09474620773993232
Bubble_Gum_1	45	0.2	2.0	1	229.3174793997821	82.41992239198663	0.2860052465174955	0.19016147686697052
Bubble_Gum_1	45	0.2	2.0	2	207.0329531197177	77.35608425312223	0.4382746504693979	0.19338046335826325
Bubble_Gum_1	45	0.2	2.0	3	217.0259164568552	77.21281720943108	0.3732210686974672	0.19084137643044252
Bubble_Gum_1	45	0.2	2.0	4	214.6247609380746	79.22112021830773	0.39217643217175774	0.18552991114627693
Bubble_Gum_1	45	0.2	2.0	5	217.79042111450227	81.15806661834354	0.3645801620188896	0.1834358159444004
Bubble_Gum_1	45	0.2	2.0	6	213.17938893056353	77.99116689459807	0.4525712211164553	0.21729784078743636
Bubble_Gum_1	45	0.2	2.0	7	215.48453863719095	81.11530030889537	0.462277765525009	0.21185037602907655
Bubble_Gum_1	45	0.2	2.0	8	225.1145732776985	84.34113194420179	0.35747415858715004	0.18251585231713705
Bubble_Gum_1	45	0.2	2.0	9	219.8978220839436	81.3419945314291	0.3851173538585224	0.1928141103286066
Bubble_Gum_1	45	0.2	2.0	10	227.63942825257575	84.7678838035013	0.3387446831441188	0.17070279183486525
Bubble_Gum_1	45	0.2	1.0	1	152.07528680624674	55.322342024479546	0.19408037967854636	0.10607716714557056
Bubble_Gum_1	45	0.2	1.0	2	157.23416183769598	56.70338833405864	0.229120257314232	0.1006049588560424
Bubble_Gum_1	45	0.2	1.0	3	158.2416163954121	59.60608821296898	0.20046368629743155	0.08523884088871618
Bubble_Gum_1	45	0.2	1.0	4	153.07889874512477	56.643488926047645	0.2425332537413567	0.10319325369712153
Bubble_Gum_1	45	0.2	1.0	5	158.32473319429684	60.57233379613991	0.2290489172089505	0.09349429984370902
Bubble_Gum_1	45	0.2	1.0	6	148.93986766978273	56.021323502755784	0.294050425190519	0.1180549631712716
Bubble_Gum_1	45	0.2	1.0	7	156.8153957399565	58.43981066742426	0.2189321033496004	0.09246441966560086
Bubble_Gum_1	45	0.2	1.0	8	153.194343977329	58.01493767769542	0.1728634928636727	0.07671768388058005
Bubble_Gum_1	45	0.2	1.0	9	155.9314698468992	58.8961129335015	0.2533570969666003	0.1077018767024299
Bubble_Gum_1	45	0.2	1.0	10	152.13065887898276	56.93781549773792	0.2926897833356227	0.11875360388560947
Bubble_Gum_1	45	0.4	2.0	1	289.2326853310725	107.13710520175724	0.5842589280955329	0.18712606442474464
Bubble_Gum_1	45	0.4	2.0	2	306.92994373320505	102.96023434974757	0.5516008445916869	0.13223228540025905
Bubble_Gum_1	45	0.4	2.0	3	300.3242876346952	101.42784131586713	0.5369334181221561	0.12978066987024006
Bubble_Gum_1	45	0.4	2.0	4	300.02657575503935	103.43789953797094	0.5346263442260477	0.13170336992574308
Bubble_Gum_1	45	0.4	2.0	5	301.2423714217758	106.80749063895313	0.6000556975695216	0.15498920700053906
Bubble_Gum_1	45	0.4	2.0	6	290.44926142914494	100.02993848791107	0.6048367015680622	0.15542046213046026
Bubble_Gum_1	45	0.4	2.0	7	294.2316035711602	103.27017695579443	0.6195789085975817	0.15963720117068705
Bubble_Gum_1	45	0.4	2.0	8	297.49880225737695	107.57611822495264	0.4654751599577096	0.12959097847242804
Bubble_Gum_1	45	0.4	2.0	9	281.9406851269697	110.27217087709128	0.6147441596711106	0.15650236829098582
Bubble_Gum_1	45	0.4	2.0	10	301.4066437597522	109.01360492549016	0.535581854468459	0.1484718049719105
Bubble_Gum_1	45	0.4	1.0	1	201.12203746003786	77.33442161798587	0.3362759088426868	0.08981147688832912
Bubble_Gum_1	45	0.4	1.0	2	202.1830060697617	74.27784290822936	0.3545707345280931	0.09124320041712768
Bubble_Gum_1	45	0.4	1.0	3	204.31895078762366	74.79984829972341	0.3306487994191925	0.08945864389333591
Bubble_Gum_1	45	0.4	1.0	4	202.54681681215075	78.00417916230994	0.30371592364191696	0.0808609344238985
Bubble_Gum_1	45	0.4	1.0	5	198.99217190941576	71.60230881427299	0.3312503983500538	0.08093399979098674
Bubble_Gum_1	45	0.4	1.0	6	203.96895235083088	73.31286796327069	0.3280298655073893	0.08976303237993319
Bubble_Gum_1	45	0.4	1.0	7	207.0184729760105	76.64474632244885	0.319895346379219	0.08400061261170395
Bubble_Gum_1	45	0.4	1.0	8	202.2578896935643	73.8059080385749	0.3081396737744396	0.07287463608349237
Bubble_Gum_1	45	0.4	1.0	9	202.3536472732008	75.14344290167863	0.33346725225799395	0.08633228607203075
Bubble_Gum_1	45	0.4	1.0	10	196.27431456134593	68.7967232044886	0.31855264600632466	0.08109803208166788
Bubble_Gum_2	0	0.06	2.0	1	106.6641902872194	-217.7042370517448	0.29113706706573395	0.006164033674026418
Bubble_Gum_2	0	0.06	2.0	2	104.83503799870296	624.9921735505587	0.3026214275268568	0.015367077845948984
Bubble_Gum_2	0	0.06	2.0	3	106.98622564094727	290.34795164478624	0.3038785809042244	0.010659461331091259
Bubble_Gum_2	0	0.06	2.0	4	109.66009445606248	-9.678355007431062	0.3070280610149881	0.010421698305280086
Bubble_Gum_2	0	0.06	2.0	5	111.06735568984173	-293.9470276396443	0.30147049674822674	0.007778924189814591
Bubble_Gum_2	0	0.06	2.0	6	109.94731104900488	171.17726216585373	0.29643447067735224	0.01009666427062362
Bubble_Gum_2	0	0.06	2.0	7	108.94503042015602	1047.7027274964132	0.305517893558547	0.032455776639737234
Bubble_Gum_2	0	0.06	2.0	8	111.72089025315388	101.4448655108251	0.3005946570089688	0.006200784630716828
Bubble_Gum_2	0	0.06	2.0	9	108.29857170292878	172.90130102350054	0.2973224580115963	0.011204499144827644
Bubble_Gum_2	0	0.06	2.0	10	110.74709673502447	-71.71611510970789	0.30509340191946543	0.006039613357469168
Bubble_Gum_2	0	0.06	1.0	1	76.67041526628626	56.28878215959498	0.1651967613061659	0.00524448411943221
Bubble_Gum_2	0	0.06	1.0	2	75.93749054907993	-258.76168610544937	0.173368663602105	0.0064069729685678365
Bubble_Gum_2	0	0.06	1.0	3	71.83332142692278	-9.66046363971944	0.1680490420610455	0.0046086527818457
Bubble_Gum_2	0	0.06	1.0	4	70.67626459563066	70.4509998627144	0.15788391559997192	0.007324852711635809
Bubble_Gum_2	0	0.06	1.0	5	67.52899153601533	97.97961880612748	0.15771192909915407	0.006555849535986621
Bubble_Gum_2	0	0.06	1.0	6	74.25996863933011	11.668358067106949	0.17378947682826004	0.006581137145585956
Bubble_Gum_2	0	0.06	1.0	7	73.88983902758889	319.116142103871	0.16589291882318152	0.004495500401164883
Bubble_Gum_2	0	0.06	1.0	8	77.24728141980279	82.93409305858067	0.1938500239454704	0.00412315134662343
Bubble_Gum_2	0	0.06	1.0	9	71.7389524810077	36.45042777355534	0.1682696277830314	0.004550259393421405
Bubble_Gum_2	0	0.06	1.0	10	71.33681692923835	-0.20932205146886892	0.17733178967580018	0.005869215229746871
Bubble_Gum_2	0	0.1	2.0	1	115.5220594681446	53.26450579439384	0.2463246363192172	0.007876331878766409
Bubble_Gum_2	0	0.1	2.0	2	117.53714682494655	-42.41427021680957	0.25668573905781505	0.0064793960507573
Bubble_Gum_2	0	0.1	2.0	3	117.64592476215265	204.24866924359145	0.24860468843583575	0.006348784622997426
Bubble_Gum_2	0	0.1	2.0	4	118.1091012651167	-334.45851815610257	0.2642933261087017	0.009330806267268435
Bubble_Gum_2	0	0.1	2.0	5	114.29879510142095	83.24373407560272	0.2299144432598511	0.013019771615621213
Bubble_Gum_2	0	0.1	2.0	6	119.12576918741685	-241.9012267795948	0.2577810417238263	0.007156802280007699
Bubble_Gum_2	0	0.1	2.0	7	113.02439014703133	21.931308767400612	0.24190940239019215	0.008049149204234038
Bubble_Gum_2	0	0.1	2.0	8	112.93342706339382	-37.07996839675598	0.24862798275838324	0.0068400982645086365
Bubble_Gum_2	0	0.1	2.0	9	114.70323722185547	80.60908982995002	0.2443302261130845	0.0058060077094724254
Bubble_Gum_2	0	0.1	2.0	10	117.1400806426891	-299.74218716828415	0.25692694951705963	0.008999238779254385
Bubble_Gum_2	0	0.1	1.0	1	76.91917583121798	46.89959993007808	0.1415773540970685	0.006136199805071931
Bubble_Gum_2	0	0.1	1.0	2	75.18018524595283	-36.81050198583602	0.12971259834946688	0.005424358706890011
Bubble_Gum_2	0	0.1	1.0	3	74.44552877930842	64.01187194471403	0.12583236370675602	0.006533498004304536
Bubble_Gum_2	0	0.1	1.0	4	78.65322409141416	-113.2508063949462	0.1354086863668921	0.007078745372743266
Bubble_Gum_2	0	0.1	1.0	5	80.1938643197544	9.82280106480582	0.1365533009021436	0.005861200083519486
Bubble_Gum_2	0	0.1	1.0	6	79.26924558251014	61.32458930735798	0.12488772740063485	0.005047876272947708
Bubble_Gum_2	0	0.1	1.0	7	77.81576653299612	-131.9593908854535	0.12554535229977945	0.005443745398017517
Bubble_Gum_2	0	0.1	1.0	8	75.04432777227433	25.78886659403556	0.12181430410516796	0.005369023486087965
Bubble_Gum_2	0	0.1	1.0	9	74.03593676213546	-154.08970538203747	0.1276206279366681	0.004845925231663413
Bubble_Gum_2	0	0.1	1.0	10	77.18949687462627	97.90805823787063	0.11749773787056138	0.007489653621150069
Bubble_Gum_2	0	0.2	2.0	1	124.76832699435624	207.57187972968134	0.325607293779312	0.010281316431660586
Bubble_Gum_2	0	0.2	2.0	2	134.16046099686375	659.161536401457	0.3502540311651381	0.012880784523464526
Bubble_Gum_2	0	0.2	2.0	3	131.22188941501665	341.08525300927425	0.3393693195020856	0.006462927449656348
Bubble_Gum_2	0	0.2	2.0	4	130.28924388530515	855.6484144440226	0.3453025839116306	0.013780849627933887
Bubble_Gum_2	0	0.2	2.0	5	122.82655906081075	-104.78123021642233	0.3141719272863551	0.008525398151385678
Bubble_Gum_2	0	0.2	2.0	6	123.71264125865368	704.3301939007529	0.3199735570426687	0.010542836710065371
Bubble_Gum_2	0	0.2	2.0	7	130.31383908901927	454.7716660063217	0.35418796537821645	0.012789819938331807
Bubble_Gum_2	0	0.2	2.0	8	127.94042294058791	179.41369029337645	0.31698173266731416	0.01004165820868187
Bubble_Gum_2	0	0.2	2.0	9	125.12273876414734	385.6746781815885	0.3337931856916973	0.007146960452349907
Bubble_Gum_2	0	0.2	2.0	10	127.03008896645673	-20.86729313906055	0.3361965518197681	0.014456838840253953
Bubble_Gum_2	0	0.2	1.0	1	94.88049993093892	180.80641211898651	0.22463097485460348	0.006360530884707084
Bubble_Gum_2	0	0.2	1.0	2	91.53227504899709	81.57853660037476	0.2132063426799924	0.008523452235882856
Bubble_Gum_2	0	0.2	1.0	3	91.63851749965015	91.44757473393153	0.2145182059347676	0.010954004752480774
Bubble_Gum_2	0	0.2	1.0	4	88.38879619777717	1.6502972818603912	0.2021426161910341	0.007954236772118449
Bubble_Gum_2	0	0.2	1.0	5	90.42275438132548	78.11260252903017	0.21009307437821287	0.004757833369686814
Bubble_Gum_2	0	0.2	1.0	6	88.41353799454342	-6.384401166625912	0.2062138507658256	0.007926361042852706
Bubble_Gum_2	0	0.2	1.0	7	91.2751438296212	-0.23803786585929745	0.21555199048389265	0.005779537742670903
Bubble_Gum_2	0	0.2	1.0	8	89.75640486425092	66.18518009734781	0.20146068976453954	0.003928009557577274
Bubble_Gum_2	0	0.2	1.0	9	91.46534597224498	185.36000429888352	0.2085392498535149	0.006138962769886128
Bubble_Gum_2	0	0.2	1.0	10	88.40639342942255	-3.701912612047685	0.2070433380734923	0.008874461265245829
Bubble_Gum_2	0	0.4	2.0	1	146.6497377078028	-155.6742043706506	0.2910061266918131	0.012568575548087784
Bubble_Gum_2	0	0.4	2.0	2	157.58691462334272	561.4087296804289	0.3102693480738273	0.01247763380499735
Bubble_Gum_2	0	0.4	2.0	3	146.02762766041045	748.8195021762434	0.2946180313626407	0.01845284750743885
Bubble_Gum_2	0	0.4	2.0	4	139.05072970083228	575.9111603820774	0.2946939837117643	0.009613614285933323
Bubble_Gum_2	0	0.4	2.0	5	144.43894543339226	-122.91580352613742	0.2948036894771833	0.008116483204266514
Bubble_Gum_2	0	0.4	2.0	6	144.5665399412608	151.10702465911737	0.3043797068527994	0.007460075456766657
Bubble_Gum_2	0	0.4	2.0	7	143.53805797291295	682.4751922282862	0.2871655428640307	0.014565803153651075
Bubble_Gum_2	0	0.4	2.0	8	148.37055350869	205.3570132772096	0.3003469606508985	0.01306257322370766
Bubble_Gum_2	0	0.4	2.0	9	151.20305802710945	175.00843603659885	0.3044255958710845	0.007280284430355178
Bubble_Gum_2	0	0.4	2.0	10	154.39318882183073	-261.05202518529154	0.3155699184780375	0.016078055423856038
Bubble_Gum_2	0	0.4	1.0	1	109.22863141547877	205.15926571945764	0.19722949988269972	0.013975618231540742
Bubble_Gum_2	0	0.4	1.0	2	108.5173174589752	327.4953334451251	0.18354375709763032	0.010816116480295871
Bubble_Gum_2	0	0.4	1.0	3	103.04588042006108	106.9238616405592	0.17779579133486367	0.008257491189587653
Bubble_Gum_2	0	0.4	1.0	4	108.89859051976858	122.43842026122121	0.1828860202386744	0.012120986019896321
Bubble_Gum_2	0	0.4	1.0	5	102.68192460847384	221.21397964491825	0.16947955341903012	0.007679905646414634
Bubble_Gum_2	0	0.4	1.0	6	106.0389753287716	315.1396037098644	0.18596561947069729	0.0052706507765131186
Bubble_Gum_2	0	0.4	1.0	7	97.26574878792536	127.15177663152672	0.15903896275525134	0.006118101125514093
Bubble_Gum_2	0	0.4	1.0	8	96.83306160771704	291.39455686356	0.16103832137536933	0.007909826511995744
Bubble_Gum_2	0	0.4	1.0	9	97.74513768736675	76.10138036487972	0.16674568001122925	0.004418325763825251
Bubble_Gum_2	0	0.4	1.0	10	107.07687981311396	10.9813787796505	0.19109138712533744	0.013998283284524234
Bubble_Gum_2	30	0.06	2.0	1	113.3309615136546	57.37785299590504	0.17476382047833253	0.06601154065186868
Bubble_Gum_2	30	0.06	2.0	2	105.76660141264372	51.29229003402583	0.19343674018685555	0.07923301481738564
Bubble_Gum_2	30	0.06	2.0	3	106.01865281508687	52.54213343060157	0.1549796678146006	0.06472356000987076
Bubble_Gum_2	30	0.06	2.0	4	114.12293138691915	58.12219523481402	0.160224495949462	0.06610317683524812
Bubble_Gum_2	30	0.06	2.0	5	106.42942030293851	53.04224736701479	0.14523225336777573	0.067964026758946
Bubble_Gum_2	30	0.06	2.0	6	115.72097724369708	57.538448366039376	0.1639843338511445	0.07179139246346394
Bubble_Gum_2	30	0.06	2.0	7	109.20328827426087	54.150660411288506	0.1678302443197589	0.07661146826361842
Bubble_Gum_2	30	0.06	2.0	8	105.74915298216064	52.079136579861036	0.22863365928692106	0.0901778591904394
Bubble_Gum_2	30	0.06	2.0	9	113.19251036225859	55.94076286382669	0.15841294125353633	0.07213127325917718
Bubble_Gum_2	30	0.06	2.0	10	102.19369959463252	49.76493503254124	0.2124292775109501	0.08500199585445374
Bubble_Gum_2	30	0.06	1.0	1	68.90428054534604	34.24022566741	0.11752280827933295	0.03805818188341237
Bubble_Gum_2	30	0.06	1.0	2	69.79976127745341	34.89983580372177	0.08884576342087018	0.02964502629378969
Bubble_Gum_2	30	0.06	1.0	3	71.5509079184911	36.3995429852495	0.109438942118568	0.03801429825741392
Bubble_Gum_2	30	0.06	1.0	4	69.53546124479747	34.60512946776913	0.08869658936258956	0.03048195197769995
Bubble_Gum_2	30	0.06	1.0	5	69.53735507669973	35.61118365206839	0.0860453436399278	0.025838031930573786
Bubble_Gum_2	30	0.06	1.0	6	70.34321600503117	35.94192807588724	0.10193636790245963	0.03500058927620354
Bubble_Gum_2	30	0.06	1.0	7	73.42101904661756	35.08791123062496	0.08891508908147296	0.02667079047117526
Bubble_Gum_2	30	0.06	1.0	8	66.94747109262275	32.51318493022539	0.12802835872046298	0.04087030429421363
Bubble_Gum_2	30	0.06	1.0	9	70.14951068542521	34.53775522509539	0.09729098575355276	0.031650482606248594
Bubble_Gum_2	30	0.06	1.0	10	70.38127413467764	34.96952959053473	0.09099316217886776	0.027963482501404038
Bubble_Gum_2	30	0.1	2.0	1	115.56735999841621	54.295794470175814	0.23677035941392804	0.07283657937187431
Bubble_Gum_2	30	0.1	2.0	2	120.31018076887845	55.92314703187709	0.2182435097885564	0.06951089314161607
Bubble_Gum_2	30	0.1	2.0	3	123.38792482745438	57.25617478062808	0.16294284755820232	0.054886842835007686
Bubble_Gum_2	30	0.1	2.0	4	121.30291435261053	55.28360360590148	0.20434662558073372	0.06668016258025798
Bubble_Gum_2	30	0.1	2.0	5	118.25101382881476	54.02000425543301	0.20805411253535214	0.07136664280377966
Bubble_Gum_2	30	0.1	2.0	6	120.77169833310546	56.5285950276133	0.16308022223851867	0.05563589944773603
Bubble_Gum_2	30	0.1	2.0	7	120.1320095448731	55.17619482354389	0.17678855829100015	0.057422995644785924
Bubble_Gum_2	30	0.1	2.0	8	120.19873372840048	56.894631592468464	0.1928649930071777	0.058820599522963125
Bubble_Gum_2	30	0.1	2.0	9	121.55313920530305	55.002428495169916	0.2011710445325936	0.07491810416209546
Bubble_Gum_2	30	0.1	2.0	10	125.35626265861147	57.0932694870732	0.2002907212120716	0.06926013876020297
Bubble_Gum_2	30	0.1	1.0	1	77.68872376503475	35.938289563898834	0.12224549219254902	0.03231104370737739
Bubble_Gum_2	30	0.1	1.0	2	77.09639018342246	33.58135909714339	0.12503595889932007	0.03528861813636886
Bubble_Gum_2	30	0.1	1.0	3	78.44629608830836	34.4668747777528	0.10497537866072053	0.0307058324979778
Bubble_Gum_2	30	0.1	1.0	4	80.66511895920527	34.6102777820409	0.11304244251985447	0.030379614791832637
Bubble_Gum_2	30	0.1	1.0	5	82.08299922497947	36.12079388158213	0.12719474062268546	0.03391754680415153
Bubble_Gum_2	30	0.1	1.0	6	81.19409170694028	35.90469967642673	0.11973403296907392	0.032341676149111334
Bubble_Gum_2	30	0.1	1.0	7	77.95548815387858	35.14311916964881	0.10106586913828114	0.025612033635452884
Bubble_Gum_2	30	0.1	1.0	8	83.48659823096644	38.42238914180673	0.1173200577978056	0.03399840015878944
Bubble_Gum_2	30	0.1	1.0	9	81.85078755592788	38.05834977087158	0.10754321181328033	0.027025740400310992
Bubble_Gum_2	30	0.1	1.0	10	84.13892322689648	38.97309831771492	0.1129429581568497	0.02765547447282089
Bubble_Gum_2	30	0.2	2.0	1	146.75689551638447	65.70623122382023	0.22981436611083506	0.06302538266562789
Bubble_Gum_2	30	0.2	2.0	2	135.41170053219167	56.69541696856725	0.2255423650372297	0.07005932537287325
Bubble_Gum_2	30	0.2	2.0	3	130.5784810791169	58.382943032414225	0.26338031226588304	0.07341581962035673
Bubble_Gum_2	30	0.2	2.0	4	148.68993329565257	64.60143427863827	0.2393308971305695	0.06934829274078971
Bubble_Gum_2	30	0.2	2.0	5	146.1531045271011	62.42684649569188	0.21309475015295434	0.06895702071914912
Bubble_Gum_2	30	0.2	2.0	6	136.62579522641005	55.975319976906526	0.3194001471920001	0.09740777886220624
Bubble_Gum_2	30	0.2	2.0	7	150.7701723105772	65.08266792214465	0.2579991215563952	0.0741465030186596
Bubble_Gum_2	30	0.2	2.0	8	148.55738514883083	64.78459010126957	0.2297541433702245	0.0750920980904782
Bubble_Gum_2	30	0.2	2.0	9	146.24871801182064	63.61965965364635	0.24268035149821215	0.0761628176575358
Bubble_Gum_2	30	0.2	2.0	10	138.07567495406693	60.84896413498723	0.2477379335016134	0.07244205723259764
Bubble_Gum_2	30	0.2	1.0	1	95.67890548088764	42.339035681643985	0.1747698798514787	0.04340411904176925
Bubble_Gum_2	30	0.2	1.0	2	93.9781233090917	40.7006748417119	0.13898436669018616	0.03542628720855178
Bubble_Gum_2	30	0.2	1.0	3	94.25679615918077	40.2912572378955	0.16173430450816606	0.044830152076527414
Bubble_Gum_2	30	0.2	1.0	4	94.27142471904413	40.48802063360776	0.15114232359528312	0.03984427649681847
Bubble_Gum_2	30	0.2	1.0	5	95.2806161498312	42.73625045733434	0.15375052065018344	0.03893074027601826
Bubble_Gum_2	30	0.2	1.0	6	98.12378080717846	42.668974860197	0.13418595774332578	0.03596109120260435
Bubble_Gum_2	30	0.2	1.0	7	95.06948880136942	42.651129030005684	0.1324420549743563	0.033413438335704614
Bubble_Gum_2	30	0.2	1.0	8	90.44664211186046	40.60621910839563	0.15936486790305174	0.03945168820564747
Bubble_Gum_2	30	0.2	1.0	9	91.44912015498792	40.20012229727066	0.18616094888995005	0.04416484530794248
Bubble_Gum_2	30	0.2	1.0	10	96.6865991141846	43.07770905595814	0.1604251228750892	0.038768212793888805
Bubble_Gum_2	30	0.4	2.0	1	171.35632472789106	70.51152384298064	0.33839742785380345	0.059305924415759936
Bubble_Gum_2	30	0.4	2.0	2	162.8145801804503	66.2330466873687	0.2963100656515901	0.05231396138016528
Bubble_Gum_2	30	0.4	2.0	3	163.88797675627893	64.33282620992854	0.3048814499971229	0.057273569066885986
Bubble_Gum_2	30	0.4	2.0	4	161.71334337179354	69.04404814314861	0.35819663623735265	0.06889471749938543
Bubble_Gum_2	30	0.4	2.0	5	157.30709643535502	64.66586299026307	0.2857990368388472	0.05752944088333457
Bubble_Gum_2	30	0.4	2.0	6	164.0430782877732	66.07028069275678	0.35485317375562114	0.08122920547812994
Bubble_Gum_2	30	0.4	2.0	7	169.6264908336663	68.54083998160918	0.3010441833863409	0.06562910109860391
Bubble_Gum_2	30	0.4	2.0	8	173.20611554103095	69.75886873016464	0.2889492501356076	0.05862602155199492
Bubble_Gum_2	30	0.4	2.0	9	160.8807835282272	64.46053890343873	0.21275046605331915	0.04004854319262627
Bubble_Gum_2	30	0.4	2.0	10	176.09049903208754	75.27739624165578	0.32998269390267165	0.06644376164983391
Bubble_Gum_2	30	0.4	1.0	1	124.48393649814444	52.44139279562965	0.21509616949343036	0.03132407469528549
Bubble_Gum_2	30	0.4	1.0	2	113.44226626482792	47.827261441324204	0.18369623852414388	0.029644346235430226
Bubble_Gum_2	30	0.4	1.0	3	117.57173638943227	48.83000323247269	0.2021811697388512	0.030414333365952086
Bubble_Gum_2	30	0.4	1.0	4	123.21982483265704	49.77933821058656	0.17269342990133438	0.028415044315825682
Bubble_Gum_2	30	0.4	1.0	5	125.52441548674808	52.68423138734833	0.17575783193471964	0.033021840943159964
Bubble_Gum_2	30	0.4	1.0	6	116.63533754694461	48.47155845897549	0.18392761520503814	0.02732870990208779
Bubble_Gum_2	30	0.4	1.0	7	113.85575901002835	47.25865099617221	0.23341396409004755	0.040072502806364964
Bubble_Gum_2	30	0.4	1.0	8	112.09771628638617	46.854268172392715	0.17165334196229082	0.03377002839153364
Bubble_Gum_2	30	0.4	1.0	9	118.49173128780956	49.94482912784532	0.17161591622872424	0.03098722333502308
Bubble_Gum_2	30	0.4	1.0	10	115.6279810863888	47.80950087994059	0.25436620077413635	0.04580277245276471
Bubble_Gum_2	45	0.06	2.0	1	111.2204256515763	58.41555330794223	0.1761360434571984	0.11636955231761678
Bubble_Gum_2	45	0.06	2.0	2	106.29478088853794	54.802205580970714	0.20055258957265493	0.13226284967490273
Bubble_Gum_2	45	0.06	2.0	3	106.72604200954422	55.136291226010684	0.20052887282840365	0.13148786674202187
Bubble_Gum_2	45	0.06	2.0	4	102.46715322649756	51.62082744408879	0.24267167453518784	0.14809466906794572
Bubble_Gum_2	45	0.06	2.0	5	108.63893495249967	56.13842575703948	0.20442979375108336	0.1321033480581442
Bubble_Gum_2	45	0.06	2.0	6	111.47622161169636	58.81782266610958	0.15301116567818152	0.10033658365217024
Bubble_Gum_2	45	0.06	2.0	7	105.96018761339184	54.32088556303913	0.1842860629371928	0.12121505740071226
Bubble_Gum_2	45	0.06	2.0	8	106.24811872317208	53.750421224947246	0.2302783928990205	0.14720263473475895
Bubble_Gum_2	45	0.06	2.0	9	108.04707968607076	55.655366828657016	0.21342848534872094	0.1405550766696124
Bubble_Gum_2	45	0.06	2.0	10	104.145447809024	53.28938528341589	0.21822321089571536	0.14058599784478473
Bubble_Gum_2	45	0.06	1.0	1	70.73968780254492	35.49907740649177	0.14056904785113564	0.07233325418627208
Bubble_Gum_2	45	0.06	1.0	2	67.57625055336385	33.41412064182867	0.13718730214188085	0.07220579707073703
Bubble_Gum_2	45	0.06	1.0	3	75.88351142796343	38.93923601015617	0.1397458735769411	0.07655079774461328
Bubble_Gum_2	45	0.06	1.0	4	72.44854796077416	36.8823624119603	0.1400613090507591	0.0745250969436597
Bubble_Gum_2	45	0.06	1.0	5	69.62953580062793	35.216385718903624	0.14249664629660255	0.08333263943403839
Bubble_Gum_2	45	0.06	1.0	6	67.70470583122592	33.024223627498664	0.16989327089565365	0.09397130593906826
Bubble_Gum_2	45	0.06	1.0	7	70.14913658673989	34.935051774197234	0.1390892914523124	0.07516819266333781
Bubble_Gum_2	45	0.06	1.0	8	71.6398269474024	36.51107038296198	0.16087458981292216	0.09060918896884576
Bubble_Gum_2	45	0.06	1.0	9	72.67937069161279	36.5228453353248	0.1581544294298154	0.09023525644983496
Bubble_Gum_2	45	0.06	1.0	10	66.41240626899493	32.57330978819578	0.16241771865651206	0.09010915555296152
Bubble_Gum_2	45	0.1	2.0	1	138.08490399375793	65.3583278297703	0.1688811932363201	0.12984925042967718
Bubble_Gum_2	45	0.1	2.0	2	119.58752141091722	55.79570587526592	0.20853750970073584	0.1131626676964148
Bubble_Gum_2	45	0.1	2.0	3	134.35362994021946	63.59931596061076	0.16172613648815293	0.0840972019713419
Bubble_Gum_2	45	0.1	2.0	4	118.0238867242277	52.76389774114354	0.18997091994960535	0.09450081617015828
Bubble_Gum_2	45	0.1	2.0	5	126.75967447784735	59.869303490568974	0.16555414750223085	0.07611086019019027
Bubble_Gum_2	45	0.1	2.0	6	130.6103502305065	61.839681024677525	0.19639690305857768	0.10336510806130768
Bubble_Gum_2	45	0.1	2.0	7	125.68389744093544	59.29261394114383	0.16066789606344678	0.0788301306704857
Bubble_Gum_2	45	0.1	2.0	8	136.26079137011655	65.03724819356032	0.2133572590413979	0.1090193355010951
Bubble_Gum_2	45	0.1	2.0	9	135.67042690837022	64.02903910816113	0.1898415544510984	0.0970698941902658
Bubble_Gum_2	45	0.1	2.0	10	127.00134686938391	59.0524352652737	0.18319767107343254	0.09609400250772852
Bubble_Gum_2	45	0.1	1.0	1	90.10315348581167	42.21805740535223	0.10366554392028282	0.03860188395458118
Bubble_Gum_2	45	0.1	1.0	2	85.73678897592063	39.760001674146736	0.12344296470912525	0.05196414561951097
Bubble_Gum_2	45	0.1	1.0	3	87.75808400965968	41.888344057521735	0.13874875315349386	0.05509812813128137
Bubble_Gum_2	45	0.1	1.0	4	84.17428433654159	38.82316670544745	0.1193842193288512	0.05589735878165239
Bubble_Gum_2	45	0.1	1.0	5	83.48728125724527	38.86338718497425	0.09535391068088782	0.03989691140478002
Bubble_Gum_2	45	0.1	1.0	6	85.84378083786315	39.830219328375776	0.1162035598609756	0.051779734547907415
Bubble_Gum_2	45	0.1	1.0	7	83.94733603395902	38.516685427797086	0.11478442815436952	0.04721486491565068
Bubble_Gum_2	45	0.1	1.0	8	84.16147422941778	38.75532483499652	0.093850955378067	0.038351609321361786
Bubble_Gum_2	45	0.1	1.0	9	83.31597666831942	37.96670210135613	0.1199980996821371	0.0477749235323056
Bubble_Gum_2	45	0.1	1.0	10	85.09375701070651	38.91232789171896	0.08724901940647148	0.035831564641756825
Bubble_Gum_2	45	0.2	2.0	1	133.6169587698004	57.96075700797432	0.2294972986432351	0.0967426832011302
Bubble_Gum_2	45	0.2	2.0	2	137.66610717519305	57.514938461699536	0.1977071138234137	0.0936211710365696
Bubble_Gum_2	45	0.2	2.0	3	131.7931593693679	54.42576856277273	0.2293311809078156	0.10320726563995046
Bubble_Gum_2	45	0.2	2.0	4	136.55922898919678	60.176648599602764	0.199529518794607	0.08943824308308088
Bubble_Gum_2	45	0.2	2.0	5	132.9978501142863	55.18728237128373	0.20482259389765173	0.09312983383328027
Bubble_Gum_2	45	0.2	2.0	6	134.74989646882082	57.778134447131684	0.2175374700869893	0.09469547529150388
Bubble_Gum_2	45	0.2	2.0	7	139.33253620667037	60.6929142870585	0.1986604398436846	0.08708284135513926
Bubble_Gum_2	45	0.2	2.0	8	138.40935339179967	57.973234465408474	0.21078833169376412	0.09680629607997794
Bubble_Gum_2	45	0.2	2.0	9	136.1627036078463	61.13829620576161	0.2654700557213939	0.10970346101008996
Bubble_Gum_2	45	0.2	2.0	10	136.55013071741996	56.75261040887625	0.22919650977848205	0.1000155813675734
Bubble_Gum_2	45	0.2	1.0	1	100.44263362472863	44.252709270766964	0.14949958030029395	0.055691930988773126
Bubble_Gum_2	45	0.2	1.0	2	95.35445455149784	41.80171648662312	0.15381380839409806	0.05863429026437712
Bubble_Gum_2	45	0.2	1.0	3	94.70142083702294	42.83410658923822	0.14106974972659553	0.04855267972393042
Bubble_Gum_2	45	0.2	1.0	4	92.88671967192874	41.65380945898911	0.14025262125466806	0.049227553192783664
Bubble_Gum_2	45	0.2	1.0	5	97.4985821751558	43.47806758066696	0.1387438788338932	0.05417330437866619
Bubble_Gum_2	45	0.2	1.0	6	94.48917406264181	42.03603285487872	0.1477796383382759	0.054608047625623976
Bubble_Gum_2	45	0.2	1.0	7	94.943217155629	42.16759163236065	0.12631892015722046	0.05095339513897485
Bubble_Gum_2	45	0.2	1.0	8	95.82916687954528	42.80431973245729	0.16252168674409576	0.06387039765203488
Bubble_Gum_2	45	0.2	1.0	9	98.01992237326738	43.94121092584869	0.14319692374038884	0.05449232835217183
Bubble_Gum_2	45	0.2	1.0	10	94.4260404784206	41.578622900049254	0.13782398848762045	0.05490628539715922
Bubble_Gum_2	45	0.4	2.0	1	173.72078953036606	71.0853357932014	0.2528211418299163	0.07963785357939113
Bubble_Gum_2	45	0.4	2.0	2	176.58999902039884	68.90381398546275	0.2401146313080307	0.07494856310195602
Bubble_Gum_2	45	0.4	2.0	3	173.2974032837112	68.80532486238137	0.2463978712870896	0.0765387728510349
Bubble_Gum_2	45	0.4	2.0	4	169.5093943760706	65.89761318297838	0.2908401340479982	0.08774434724466773
Bubble_Gum_2	45	0.4	2.0	5	174.23711824797172	67.18129160882106	0.2556771884680917	0.08272193119035175
Bubble_Gum_2	45	0.4	2.0	6	163.87787890267504	63.63618850249031	0.2963936024519353	0.10182129092583464
Bubble_Gum_2	45	0.4	2.0	7	168.8008032479626	66.18154437964695	0.2831524517372359	0.0901803148046213
Bubble_Gum_2	45	0.4	2.0	8	164.3575197921361	66.22403130803566	0.3043865682481723	0.09731682455362917
Bubble_Gum_2	45	0.4	2.0	9	163.3794112682428	65.42568717068444	0.2488021708257292	0.07885931171625349
Bubble_Gum_2	45	0.4	2.0	10	169.7481045964474	69.49190997243132	0.3099567881104881	0.0913038044342539
Bubble_Gum_2	45	0.4	1.0	1	117.53729001568787	46.19570129917838	0.14253472636756778	0.0390697936777764
Bubble_Gum_2	45	0.4	1.0	2	117.16028177558665	49.94976013942036	0.13185177570250142	0.04453428663223713
Bubble_Gum_2	45	0.4	1.0	3	108.96681622251457	44.53203675674669	0.18636711164773329	0.04772629867426778
Bubble_Gum_2	45	0.4	1.0	4	119.43248465261692	49.962260498695336	0.14801842463284287	0.044554377431679636
Bubble_Gum_2	45	0.4	1.0	5	115.583383894639	47.963394469260166	0.14183664316619102	0.0372575542069297
Bubble_Gum_2	45	0.4	1.0	6	118.44458059787408	48.51792267544641	0.1568976552042197	0.03600137942327267
Bubble_Gum_2	45	0.4	1.0	7	124.08621014538012	51.87771422407686	0.14075316906071753	0.0419381411078671
Bubble_Gum_2	45	0.4	1.0	8	112.9978910176944	46.050265697439535	0.17362691334148395	0.04402711807926707
Bubble_Gum_2	45	0.4	1.0	9	119.17599788221435	51.66824426691452	0.17081413482655186	0.036150080890334516
Bubble_Gum_2	45	0.4	1.0	10	117.29281516322493	49.90561030373882	0.1733687693606385	0.039467704766617935
Sausage	0	0.06	2.0	1	82.38249469197646	12.746075943466217	0.3268168772366796	0.006772162571237778
Sausage	0	0.06	2.0	2	97.14759266762783	772.9918170851154	0.4137395323000321	0.013214497778507864
Sausage	0	0.06	2.0	3	82.62910704232803	248.3700350926496	0.37540074483382185	0.016695196934903768
Sausage	0	0.06	2.0	4	105.10603882385674	156.53188604639567	0.4754091104050008	0.009199430294653688
Sausage	0	0.06	2.0	5	208.9652633650547	3788.7544559474404	1.0299083706407015	0.07499804369777438
Sausage	0	0.06	2.0	6	190.23436850671916	3628.8656025418545	0.957757176931904	0.08032938883694972
Sausage	0	0.06	2.0	7	89.66198801566038	2095.6301145364732	0.3233953214624606	0.04358215180623645
Sausage	0	0.06	2.0	8	140.09879669891026	1261.4332061593118	0.682278233268708	0.033312420559138155
Sausage	0	0.06	2.0	9	192.95654781215953	651.2338450414536	1.0328602863421854	0.043509937040544636
Sausage	0	0.06	2.0	10	182.4177668862903	542.319821384845	0.942054461138794	0.04600056589787442
Sausage	0	0.06	2.0	11	111.25581259460704	1830.570316681995	0.4828163055080468	0.02548105010824065
Sausage	0	0.06	1.0	1	177.95223989401075	1621.474782496167	0.9105080150235436	0.041844990692852815
Sausage	0	0.06	1.0	2	192.77216420961784	1993.0230293577813	0.9056654581026059	0.046315282557804295
Sausage	0	0.06	1.0	3	197.95416975321967	4938.176429541532	0.9965033572121672	0.10383312776863146
Sausage	0	0.06	1.0	4	191.641158656398	907.4558531251008	0.9616983685072318	0.03889538065959375
Sausage	0	0.06	1.0	5	211.6072143870662	2412.4888394810578	1.2175788592254009	0.06573189128561596
Sausage	0	0.06	1.0	6	178.1298565931708	2219.0371817292666	0.8963542271826382	0.0573202199356598
Sausage	0	0.06	1.0	7	177.75899696052022	4972.907375694384	0.9117092571829152	0.07621999664789042
Sausage	0	0.06	1.0	8	181.7578261168391	5342.753627183672	0.94227699662259	0.10082173418050196
Sausage	0	0.06	1.0	9	133.66679247570755	2869.202436224449	0.6221193069272242	0.05608584263066056
Sausage	0	0.06	1.0	10	180.2073258115097	323.0146603161382	0.8939031156543429	0.015755287492200017
Sausage	0	0.06	1.0	11	197.53201010371768	1908.4994425438185	1.0062863573751766	0.037012357959670436
Sausage	0	0.1	2.0	1	195.5728238675145	3317.8740653801783	0.7986859991475384	0.10246317186487404
Sausage	0	0.1	2.0	2	189.61649394787906	3870.8395896228685	0.7943139734604622	0.0987076027858681
Sausage	0	0.1	2.0	3	145.21072384604673	213.8872546292765	0.6725838883973579	0.014950703624331738
Sausage	0	0.1	2.0	4	130.09459757914098	4058.733032027173	0.6487641181952186	0.04309250661671744
Sausage	0	0.1	2.0	5	117.67402152930315	718.8570859468782	0.5265792094468014	0.021492491536118253
Sausage	0	0.1	2.0	6	93.96375873886598	4090.5056011133584	0.4443450676603973	0.040885221480784974
Sausage	0	0.1	2.0	7	175.19700833339868	-1078.3249283954508	0.9014877042801313	0.03806365904498245
Sausage	0	0.1	2.0	8	143.63272555361385	2774.4949164049635	0.7413717524140453	0.05743128139228741
Sausage	0	0.1	2.0	9	109.6836056377144	1738.2887634723459	0.4858734554426647	0.02108304706286125
Sausage	0	0.1	2.0	10	101.64860474167492	2595.752517263908	0.4678521593164017	0.04077568165456673
Sausage	0	0.1	2.0	11	80.81527376289621	1806.276514862605	0.3249515638329315	0.03140543905878071
Sausage	0	0.1	2.0	12	77.49207458023987	648.8207672029629	0.2465412478545317	0.013074541041993348
Sausage	0	0.1	2.0	13	76.00121132560045	895.2683972505502	0.29518342864897584	0.02037596720545523
Sausage	0	0.1	1.0	1	76.51630815152141	-247.04674497971934	0.3601267908207077	0.015008689187688138
Sausage	0	0.1	1.0	2	95.52177068098122	504.0766268952224	0.3343976144283115	0.02387428810074488
Sausage	0	0.1	1.0	3	108.7094228681178	1671.0992901050279	0.4405065265440976	0.01540552255504492
Sausage	0	0.1	1.0	4	109.49340136905604	1161.7098581167775	0.40230557648736603	0.023199122689885717
Sausage	0	0.1	1.0	5	102.10779457048737	1793.275628287662	0.4064050554514361	0.0302599955883492
Sausage	0	0.1	1.0	6	94.4806583157176	2030.1017891327397	0.3716693384819621	0.033329505703940165
Sausage	0	0.1	1.0	7	134.7882480066711	2898.295402302562	0.7111939910391475	0.08936732027312211
Sausage	0	0.1	1.0	8	97.2596623071862	-2088.776268785632	0.3579477824602528	0.04814597425518582
Sausage	0	0.1	1.0	9	108.54664343801757	1634.2307905993398	0.4415792833045138	0.04328288256779145
Sausage	0	0.1	1.0	10	84.24890834503907	1654.6998356907131	0.3470948026384244	0.028433276132513736
Sausage	0	0.1	1.0	11	73.6380164396836	-315.8920308561485	0.2925650325229567	0.014931661765995944
Sausage	0	0.1	1.0	12	96.97730936812144	257.5845118714184	0.33731852439935084	0.018242047372612414
Sausage	0	0.2	2.0	1	161.49711496130735	312.8616608259649	0.6148592666068973	0.022097567710906388
Sausage	0	0.2	2.0	2	171.2071756879663	5222.9465521443935	0.7309821177495176	0.08907769556408697
Sausage	0	0.2	2.0	3	111.01921958440386	601.9047080735392	0.4187625676840961	0.017875048359293412
Sausage	0	0.2	2.0	4	91.25418120377999	227.38384788564008	0.32797333203916884	0.01024971710064933
Sausage	0	0.2	2.0	5	126.1002398325326	341.11175699374365	0.4628184316347193	0.01026515231465324
Sausage	0	0.2	2.0	6	113.72340616997495	570.111365447382	0.4106459645122112	0.016191978997937544
Sausage	0	0.2	2.0	7	154.71747340027875	3142.4380607971016	0.6135852623414716	0.0558419291844148
Sausage	0	0.2	2.0	8	154.33958990601934	2959.931593014675	0.5881269154869508	0.06554659350490108
Sausage	0	0.2	2.0	9	181.1655775119525	4007.764268128101	0.9371538486970532	0.050024717196457714
Sausage	0	0.2	2.0	10	166.9625834846018	3572.7899786003118	0.7280522043994953	0.05800279005010985
Sausage	0	0.2	2.0	11	90.59506936777572	434.4866367201488	0.3502467927739051	0.008729758402321566
Sausage	0	0.2	2.0	12	97.9828690510538	780.4865718938128	0.3404235389767685	0.01552809625092569
Sausage	0	0.2	1.0	1	167.0634372506061	2284.3262073467504	0.6577436491061063	0.04673154503538201
Sausage	0	0.2	1.0	2	168.96477030364744	4593.576823926809	0.6956423514391528	0.0792729320080964
Sausage	0	0.2	1.0	3	117.42101602392175	213.34408376525934	0.4478815312859721	0.008105909714603385
Sausage	0	0.2	1.0	4	132.64294948766283	545.9107451473584	0.4942944742193789	0.01535218303744635
Sausage	0	0.2	1.0	5	100.49633326929364	996.5986500423359	0.3546077921834773	0.019300072634713585
Sausage	0	0.2	1.0	6	162.3622603527939	1256.6250368937554	0.7298170085037167	0.04811420767546249
Sausage	0	0.2	1.0	7	191.69202002970934	-227.8213993120809	0.9094676939822458	0.0205631964534151
Sausage	0	0.2	1.0	8	187.58512433918284	2478.3410536551546	0.8674414220895341	0.035690573696625504
Sausage	0	0.2	1.0	9	210.1806583642336	5420.75912582477	0.9029470095270384	0.0975600002053168
Sausage	0	0.2	1.0	10	206.41377656053672	3795.877218709641	0.9235724604231316	0.06813029692129845
Sausage	0	0.2	1.0	11	105.15851766366823	1362.4615233524596	0.3762957442347328	0.02663504969509103
Sausage	0	0.2	1.0	12	103.64477587811515	1235.5516704280983	0.3861166722991666	0.016197977834544557
Sausage	0	0.4	2.0	1	113.40567550304836	726.2301207677154	0.4334861100220159	0.02670327923455907
Sausage	0	0.4	2.0	2	108.09200782189623	182.91947170569085	0.4660282892259252	0.02244567578889152
Sausage	0	0.4	2.0	3	100.67723103873227	1306.0169084041188	0.3356379870185236	0.03312515692287187
Sausage	0	0.4	2.0	4	165.31818673077393	20.267919883264263	0.6024759399617583	0.027129704268514302
Sausage	0	0.4	2.0	5	173.4063202122032	-31.579829473993204	0.6586131748445135	0.03540463052021554
Sausage	0	0.4	2.0	6	164.94241125672016	4293.985947212542	0.6836333199958461	0.10786648896531847
Sausage	0	0.4	2.0	7	148.91184329252738	3792.061331556734	0.5601356526250745	0.07326292027505951
Sausage	0	0.4	2.0	8	108.78060915474539	536.3289203358785	0.3866161915585191	0.013644100932733286
Sausage	0	0.4	2.0	9	103.36046822955792	1511.4171583259524	0.38233550682180056	0.027494294458101226
Sausage	0	0.4	2.0	10	186.8391598247304	475.02587731839253	0.7166407506965359	0.041099274165763
Sausage	0	0.4	2.0	11	114.30766687610574	-267.36986015009285	0.487760147721252	0.009237231958461968
Sausage	0	0.4	2.0	12	112.83691807893295	46.50910390484594	0.4362570389480646	0.015118454323533731
Sausage	0	0.4	1.0	1	217.33973030238386	1138.8763147244215	0.9135565594887576	0.024711876485202268
Sausage	0	0.4	1.0	2	223.79022991154284	1435.815686186766	1.0067212857347667	0.049476994952319935
Sausage	0	0.4	1.0	3	93.34866132621856	1.2523166477567127	0.2754264944453064	0.007334064290482624
Sausage	0	0.4	1.0	4	82.53542889310894	763.9881846430771	0.24397973648473786	0.012464658478366518
Sausage	0	0.4	1.0	5	200.16111633045867	2711.698611194431	0.7359530818540465	0.07599268770925516
Sausage	0	0.4	1.0	6	212.322492500876	3924.801436755397	0.8073071870942995	0.10078133012211647
Sausage	0	0.4	1.0	7	95.41214289389187	1640.611593105246	0.3587794154557898	0.016479650220910958
Sausage	0	0.4	1.0	8	201.73653767990805	2167.8850845591637	0.7893932149745775	0.04787204782987789
Sausage	0	0.4	1.0	9	206.80512779271882	3780.4283510452697	0.9114158626214668	0.08509306607926527
Sausage	0	0.4	1.0	10	107.65375339758654	882.9756498252837	0.3429670698776059	0.014994297512736053
Sausage	0	0.4	1.0	11	99.58809817650437	4.749602999277958	0.32455632756337965	0.010204878250882768
Sausage	0	0.4	1.0	12	101.76234029117761	501.77218199096507	0.33715104175048777	0.01883387497342677
Sausage	30	0.06	2.0	1	190.24047869873976	120.22370528084595	0.2741032208641137	0.15093127347005794
Sausage	30	0.06	2.0	2	138.2872833318032	76.91885235669649	0.18318888873010786	0.07961368575088651
Sausage	30	0.06	2.0	3	138.41472997365398	75.26885317724242	0.2261830667797373	0.08981271342333783
Sausage	30	0.06	2.0	4	131.37879550032127	69.95548879591632	0.2389288548397244	0.10587521545947468
Sausage	30	0.06	2.0	5	150.45911891276268	81.77370361962387	0.28813763379083257	0.11080813252524532
Sausage	30	0.06	2.0	6	123.53499361374408	63.251767868098305	0.21127414509623307	0.10530107471828858
Sausage	30	0.06	2.0	7	115.31334553659133	58.05328970138116	0.21286542167806294	0.09564151215712087
Sausage	30	0.06	2.0	8	128.288094245893	65.48806581069272	0.5631254240439355	0.2125970500822748
Sausage	30	0.06	2.0	9	127.41878570845186	67.36942779184425	0.2173048958776206	0.07290195622943839
Sausage	30	0.06	2.0	10	131.03623674304347	64.8798418809698	0.1945525314710161	0.08899028826657092
Sausage	30	0.06	2.0	11	147.56643991802432	78.94051582269636	0.23683665932489134	0.12360244756112995
Sausage	30	0.06	2.0	12	143.03661545334134	73.60481442987657	0.3060529411279299	0.14207681122536708
Sausage	30	0.06	2.0	13	127.72258608345973	69.37379511963168	0.19487529045833926	0.0840523308054049
Sausage	30	0.06	1.0	1	180.18970123457768	97.03373315722	0.4978323042770806	0.18247615162912995
Sausage	30	0.06	1.0	2	151.71024338054687	83.94983149616829	0.3135026094335339	0.10408865585843814
Sausage	30	0.06	1.0	3	105.42693353095453	46.96490817145557	0.3956063134516166	0.13197588928558115
Sausage	30	0.06	1.0	4	191.27444301410378	111.05591650472546	0.40312299742297897	0.1601552237552896
Sausage	30	0.06	1.0	5	132.86085164948713	67.22619287183811	0.2497404996432171	0.11702199691742085
Sausage	30	0.06	1.0	6	98.09873762821029	48.288839048895795	0.270757433733438	0.10857362905240736
Sausage	30	0.06	1.0	7	115.92713718983096	63.88174731235111	0.1004935141740485	0.045743050767264135
Sausage	30	0.06	1.0	8	85.10277150809327	39.01033038818437	0.4907205587556842	0.17120414780333473
Sausage	30	0.06	1.0	9	154.58443735602995	69.49970750977953	0.5034298140081612	0.15736617335105382
Sausage	30	0.06	1.0	10	148.70645174766383	81.5657981184171	0.2421291106829676	0.10729794006782084
Sausage	30	0.06	1.0	11	102.75438817847454	52.032066453570756	0.1931282499104857	0.0764019941324594
Sausage	30	0.06	1.0	12	141.8873278470986	83.17279509502116	0.14761907881743802	0.07633111209925482
Sausage	30	0.06	1.0	13	150.5987859885528	87.15352858346996	0.2656082465609145	0.11127873854584906
Sausage	30	0.1	2.0	1	178.51244227823832	100.78750058084933	0.4756113596666526	0.19466005590343646
Sausage	30	0.1	2.0	2	109.28530359591238	57.73005143184098	0.20504824373646355	0.08086443351316007
Sausage	30	0.1	2.0	3	131.7729084235389	70.77616580627641	0.33786611408861544	0.12753650059857513
Sausage	30	0.1	2.0	4	139.7435657811182	76.10094226585007	0.2823339699975163	0.11946785020384368
Sausage	30	0.1	2.0	5	207.2518673172123	124.7725805056402	0.5469310195850406	0.21769958489790447
Sausage	30	0.1	2.0	6	120.91781947672632	72.38139577658102	0.2049270963940231	0.07236475256068849
Sausage	30	0.1	2.0	7	158.91593410281	96.0445660238957	0.33454540789654524	0.12098059720434692
Sausage	30	0.1	2.0	8	164.12275229871196	104.41973142320091	0.26827681706613554	0.13385575094584126
Sausage	30	0.1	2.0	9	171.9760876384198	95.49521993854961	0.6387212206046241	0.25341056457299593
Sausage	30	0.1	2.0	10	110.6968907471249	63.00393867032472	0.19059478662106505	0.07094452258824456
Sausage	30	0.1	2.0	11	118.22265091873345	65.46683927725662	0.21617820745724567	0.07688004150039092
Sausage	30	0.1	2.0	12	196.2813374397619	125.19734063597387	0.4085426416455356	0.18386081502502027
Sausage	30	0.1	2.0	13	202.27675346443704	126.3392132997631	0.4390468565992049	0.19730738957524693
Sausage	30	0.1	1.0	1	166.46453966482267	97.6703354611163	0.3289037313106439	0.1402104162346664
Sausage	30	0.1	1.0	2	184.42612101187936	107.26034732059631	0.3786541804277161	0.18651956749275087
Sausage	30	0.1	1.0	3	192.3164481741464	133.90954502860185	0.4781633944107878	0.18396468358262866
Sausage	30	0.1	1.0	4	197.64245005302436	121.00853910558928	0.5535669212626564	0.24025230170414055
Sausage	30	0.1	1.0	5	193.45197216730267	118.19872280881093	0.4819719376461829	0.19471386558640288
Sausage	30	0.1	1.0	6	164.1472419489879	99.7802225108914	0.36214494460851054	0.12675434211082393
Sausage	30	0.1	1.0	7	212.5751718870421	133.50056722336655	0.5923368258628319	0.2664078349657372
Sausage	30	0.1	1.0	8	222.9690354635451	138.69710855140892	0.6779822436300205	0.2797427614551177
Sausage	30	0.1	1.0	9	175.84355342031301	102.36726312337623	0.3561104242312869	0.1602398763244889
Sausage	30	0.1	1.0	10	204.2876456590032	124.29911851306102	0.4868468964152358	0.2046864650617822
Sausage	30	0.1	1.0	11	70.6206269673558	39.500590392739035	0.05948219161393253	0.027079067201777208
Sausage	30	0.1	1.0	12	81.1954246292651	46.21130451345402	0.12210892709869607	0.05522738340100685
Sausage	30	0.1	1.0	13	119.98561299185646	63.69856489906907	0.51589981085991	0.2033064728121788
Sausage	30	0.2	2.0	1	191.5465941222516	117.48657628236076	0.4058330775009121	0.17920974553115512
Sausage	30	0.2	2.0	2	174.51436612460552	106.85259337799896	0.4678754640337779	0.18009826181150976
Sausage	30	0.2	2.0	3	139.31075428688575	83.77309439435466	0.22858207669136366	0.11184895508255263
Sausage	30	0.2	2.0	4	166.69860780997007	105.66082047338662	0.2736560573714737	0.1162883725901882
Sausage	30	0.2	2.0	5	151.29420299310465	92.90932192984494	0.3927631162967911	0.19617047744925376
Sausage	30	0.2	2.0	6	131.40939772978652	78.49337468590058	0.39438197571805605	0.16727346661028047
Sausage	30	0.2	2.0	7	291.4135093599576	188.42523559537835	0.4560853468734751	0.28453264887769586
Sausage	30	0.2	2.0	8	306.75263491777065	197.46802632979106	0.5763228009788872	0.31609457234513805
Sausage	30	0.2	2.0	9	259.4078661565818	169.99123834478843	0.645264976918091	0.32427970428564284
Sausage	30	0.2	2.0	10	255.70314257010412	165.60464195692833	0.5414950858290765	0.2960570531311688
Sausage	30	0.2	2.0	11	234.16320431818872	154.47568199593542	0.5882984259531119	0.30126906148319554
Sausage	30	0.2	2.0	12	228.9571082160093	146.25241114941232	0.4490149383861396	0.2416966953877701
Sausage	30	0.2	1.0	1	106.59449870963293	64.08679822921071	0.210867537704731	0.1067240394692245
Sausage	30	0.2	1.0	2	112.72159052709095	69.25383337094226	0.3438442399801797	0.15520193175921435
Sausage	30	0.2	1.0	3	93.8555421783461	56.118107989099975	0.20908295389186987	0.10447439328191868
Sausage	30	0.2	1.0	4	102.64155560766699	61.71666929945619	0.2629596295496892	0.1223329586306296
Sausage	30	0.2	1.0	5	199.84762379128355	133.48753150384056	0.29176433844899285	0.1361860887950526
Sausage	30	0.2	1.0	6	193.9060678866003	130.7281969278428	0.3444735656167636	0.13874608815262188
Sausage	30	0.2	1.0	7	194.89332019845907	123.66388540487293	0.37425657231169307	0.1584028476522881
Sausage	30	0.2	1.0	8	206.18160798080177	124.22657661439936	0.4551750126812512	0.17509362592178726
Sausage	30	0.2	1.0	9	210.8324366141888	137.20465166642697	0.3501445990701761	0.16402263017302812
Sausage	30	0.2	1.0	10	187.76908040551496	120.22271927920914	0.4484998158199599	0.2032827342010879
Sausage	30	0.2	1.0	11	214.96479479218345	145.23890820553507	0.3936189307226688	0.19408967817300013
Sausage	30	0.2	1.0	12	224.75775159567013	144.5102181090274	0.4863357462260241	0.22734255583851815
Sausage	30	0.4	2.0	1	217.94924024381748	173.7181294228607	0.4194904617854072	0.1978438827723279
Sausage	30	0.4	2.0	2	189.89011859062154	152.3940859877388	0.4389931487484654	0.26973496536426583
Sausage	30	0.4	2.0	3	132.78081301328874	97.61929355868088	0.18807914154109748	0.07408791575023553
Sausage	30	0.4	2.0	4	144.55341631636426	106.66336516673721	0.2748398851286194	0.11503331148830286
Sausage	30	0.4	2.0	5	201.8558747156028	159.40594350859772	0.2688471844677188	0.12724455458549966
Sausage	30	0.4	2.0	6	189.35836174100757	146.83518551033492	0.3517558613187416	0.16961635484535367
Sausage	30	0.4	2.0	7	198.09218973477465	163.9144398273043	0.4167489727704246	0.17600329011942478
Sausage	30	0.4	2.0	8	203.92166253200566	168.7272114890052	0.3211964811557512	0.13781523211045618
Sausage	30	0.4	2.0	9	162.31464094316834	125.39520448175315	0.3108213102996339	0.1597995286237822
Sausage	30	0.4	2.0	10	139.1497132306343	105.47639164391094	0.2791757857120237	0.1268497270067285
Sausage	30	0.4	2.0	11	127.78349199795669	94.4345334646913	0.23966790145399944	0.115721491945849
Sausage	30	0.4	2.0	12	119.16810907695034	85.93246914344579	0.20251999999521847	0.0916558306040422
Sausage	30	0.4	1.0	1	209.6752447506009	163.02699216189583	0.29487468315773685	0.11243065364739384
Sausage	30	0.4	1.0	2	178.91438936513114	135.83046122621073	0.4750956401577139	0.23177913801308825
Sausage	30	0.4	1.0	3	113.37097265178454	85.92086118677518	0.20470716283960566	0.07953855609681706
Sausage	30	0.4	1.0	4	139.54130137679005	107.09864781775556	0.20061291485650834	0.0933105103729604
Sausage	30	0.4	1.0	5	156.30250709085536	118.69287768630632	0.2093632328420158	0.09873428016759957
Sausage	30	0.4	1.0	6	126.16419475733204	92.40364684742754	0.2093100099398008	0.09932677650415396
Sausage	30	0.4	1.0	7	108.45073527182628	76.89909113703027	0.11808298441242955	0.04448798910285103
Sausage	30	0.4	1.0	8	107.20359639615083	76.39066192594929	0.1825886415596576	0.06996245794672809
Sausage	30	0.4	1.0	9	121.0475939780403	84.09540289540026	0.18604227814878213	0.06715006724120487
Sausage	30	0.4	1.0	10	108.07868809660235	80.39855741586389	0.2087042875056108	0.09936582448794808
Sausage	30	0.4	1.0	11	123.9420212453142	88.46563903600114	0.15797058764624333	0.0664792176029525
Sausage	30	0.4	1.0	12	178.86597643991556	141.00647132971858	0.2655283025572027	0.1289925236492952
Sausage	45	0.06	2.0	1	192.6914990991312	102.7777001492951	0.3671296271115574	0.3169997774925593
Sausage	45	0.06	2.0	2	189.87428667554758	97.24948050447613	0.5025976681885159	0.3905990636967192
Sausage	45	0.06	2.0	3	116.78553529927875	57.581999675237626	0.14001426814855109	0.1104204889972932
Sausage	45	0.06	2.0	4	124.56019499488403	62.36637961317815	0.2060839505684136	0.15550087636502385
Sausage	45	0.06	2.0	5	201.32770941070027	110.94799211233688	0.4297196217651004	0.3409258764433393
Sausage	45	0.06	2.0	6	206.9474535009884	113.01018406784745	0.47282349619870295	0.3657079748777687
Sausage	45	0.06	2.0	7	216.76412714523275	120.58569902766016	0.4733996874016772	0.3777902547024829
Sausage	45	0.06	2.0	8	193.39264107127974	108.96965756804278	0.3481470045158764	0.2938495736582672
Sausage	45	0.06	2.0	9	221.12086914766797	127.64367629757648	0.3034761942492156	0.28648199887165576
Sausage	45	0.06	2.0	10	227.6149067252817	128.8412802159633	0.3658670957703791	0.29908653859116885
Sausage	45	0.06	2.0	11	209.80285647279652	114.98279378800524	0.5243932235097843	0.4037353401288952
Sausage	45	0.06	2.0	12	191.7465686331965	105.68223216539677	0.4725094051508089	0.3566027156403208
Sausage	45	0.06	1.0	1	222.7608028117798	139.87591999500614	0.4687801072085515	0.2807678476403281
Sausage	45	0.06	1.0	2	211.33760405811947	117.89835509086942	0.2788361959937412	0.21779247763232107
Sausage	45	0.06	1.0	3	174.09934857202603	99.10149436045752	0.2179671396375748	0.14194038804392786
Sausage	45	0.06	1.0	4	141.96499858913626	77.5033541513026	0.12894710233595216	0.08331174592057697
Sausage	45	0.06	1.0	5	134.37451684816207	69.15186199416131	0.27381994879046034	0.18958446817622315
Sausage	45	0.06	1.0	6	118.55682577607809	57.37019664787098	0.2532834813511497	0.1718161368948772
Sausage	45	0.06	1.0	7	96.65753126696433	50.58421266517436	0.27213335108229664	0.1697686967254126
Sausage	45	0.06	1.0	8	83.07661712101279	41.65137211798183	0.2543209336277925	0.15070975069082596
Sausage	45	0.06	1.0	9	100.22508159001596	50.183027290042084	0.1930871069264906	0.1409144163612911
Sausage	45	0.06	1.0	10	255.3964881529747	160.50952187050683	0.3219158209352385	0.2352642369153022
Sausage	45	0.06	1.0	11	237.69915708839721	137.94702256551906	0.3372800371635027	0.25746218344651245
Sausage	45	0.06	1.0	12	195.2603223240037	109.83051176443715	0.6419954937892175	0.4144912084124819
Sausage	45	0.06	1.0	13	226.20337682796847	122.30407628482932	0.6193423014333533	0.4263619645113812
Sausage	45	0.1	2.0	1	177.36873218284197	98.03536018130997	0.5335973188634093	0.3882400450423728
Sausage	45	0.1	2.0	2	182.69219701998486	94.78199660351017	0.7358518102366435	0.4878229209772189
Sausage	45	0.1	2.0	3	76.05484010217612	37.807493511436824	0.0922561181788996	0.06282072850303724
Sausage	45	0.1	2.0	4	72.00461978550983	35.75032584845974	0.0922133196128062	0.05614738411348542
Sausage	45	0.1	2.0	5	200.4658917534894	114.08249030748595	0.5545706578558912	0.4297715165015347
Sausage	45	0.1	2.0	6	200.1549100029214	115.66325905993826	0.4524323605107679	0.3625587552536188
Sausage	45	0.1	2.0	7	229.78549592250766	137.36625096599477	0.4493102366488635	0.3624976115035797
Sausage	45	0.1	2.0	8	195.900065112442	117.84330810614475	0.24781564823479746	0.2015091080213292
Sausage	45	0.1	2.0	9	85.60655310616117	47.22698502050582	0.13545586975491167	0.09924327450021607
Sausage	45	0.1	2.0	10	79.23312307175476	42.53413572586994	0.12532050511128853	0.09117361153520366
Sausage	45	0.1	2.0	11	189.3460947302004	116.33710057813653	0.29462132225518894	0.1828512071363448
Sausage	45	0.1	2.0	12	214.02865885249398	128.01751881639697	0.35197357688945674	0.25085957165064504
Sausage	45	0.1	2.0	13	117.8150072879768	66.05204743034007	0.1487539810052028	0.11199509620836368
Sausage	45	0.1	1.0	1	196.70833243425375	122.57491249102735	0.5158894477880926	0.37855190314015424
Sausage	45	0.1	1.0	2	192.5541270260487	117.42520431112034	0.5778349654011246	0.3905015747978288
Sausage	45	0.1	1.0	3	191.39597555470766	118.58506486453213	0.461275624883459	0.3456053077339449
Sausage	45	0.1	1.0	4	194.8829137503001	120.24995579807992	0.4819440187374681	0.3452876156649707
Sausage	45	0.1	1.0	5	91.40318490850474	52.336260473618836	0.15112723676201642	0.09540981987747144
Sausage	45	0.1	1.0	6	73.96646087416347	41.97878111574438	0.0982092683311636	0.06319126298789328
Sausage	45	0.1	1.0	7	239.4155489179933	154.07634294945265	0.36616055073604337	0.2452211815127317
Sausage	45	0.1	1.0	8	245.4005030613757	156.14282905882115	0.3030913395257435	0.21999387935271209
Sausage	45	0.1	1.0	9	94.84543001910076	54.46906895021743	0.10737627001523972	0.06818514443792371
Sausage	45	0.1	1.0	10	84.08532834650062	49.00581441307878	0.1341130179163198	0.0839386373071207
Sausage	45	0.1	1.0	11	199.01111463830267	122.46816896668933	0.4893689190865969	0.3660686623645583
Sausage	45	0.1	1.0	12	181.7980408626644	110.80395988317493	0.5598321984288359	0.4202874588386173
Sausage	45	0.2	2.0	1	112.16563634846689	68.57750959808723	0.12183869696674075	0.1082508305293494
Sausage	45	0.2	2.0	2	103.5439176926478	62.14770857765978	0.1143210690357202	0.08912562886925368
Sausage	45	0.2	2.0	3	113.18034882736727	69.91590533582959	0.26114036765838905	0.19509641336074876
Sausage	45	0.2	2.0	4	92.06948753060948	65.31110951716235	0.09063598098684032	0.08818783458203279
Sausage	45	0.2	2.0	5	105.81789517649727	70.64718044941802	0.08640047843797834	0.07297970885237934
Sausage	45	0.2	2.0	6	206.00669598538386	148.1027948783239	0.17479097330183824	0.15432355005800993
Sausage	45	0.2	2.0	7	206.59948816001167	143.52947026295	0.17281953915098552	0.12709460539865436
Sausage	45	0.2	2.0	8	118.37416598247708	84.87653969251352	0.16125139342739905	0.14890237791475153
Sausage	45	0.2	2.0	9	94.35331046454476	63.65245651418319	0.16199407641081265	0.13435410331496025
Sausage	45	0.2	2.0	10	127.73804915538669	85.99419161337843	0.12177546099826587	0.10491705943477364
Sausage	45	0.2	2.0	11	279.14413384260774	201.54287544220657	0.19955199077561847	0.15110371156858618
Sausage	45	0.2	2.0	12	291.5642645872321	202.68339951197544	0.2737702120873582	0.20142625709197168
Sausage	45	0.2	1.0	1	255.69041650153062	184.72990415953288	0.2309369950504733	0.18932921374994835
Sausage	45	0.2	1.0	2	212.00248668084106	142.99177370788104	0.1906579924083097	0.11928296200477365
Sausage	45	0.2	1.0	3	109.10428511198346	68.89835079707323	0.11692465013809344	0.09545782245270634
Sausage	45	0.2	1.0	4	125.5758581568338	80.30059348457185	0.1224595676978988	0.07432583899559714
Sausage	45	0.2	1.0	5	191.55578016738662	125.58477248045085	0.27834985917382105	0.20438253883591084
Sausage	45	0.2	1.0	6	221.5112182780052	145.9255133293943	0.3839223768823487	0.2784221524180012
Sausage	45	0.2	1.0	7	235.1521744747428	152.33281329089607	0.3776461303657573	0.3081838695802961
Sausage	45	0.2	1.0	8	98.4229655401858	62.22966556025949	0.2451291767406283	0.16813806609756388
Sausage	45	0.2	1.0	9	115.8549427341099	70.08071568136063	0.17616409614819478	0.12496994746500298
Sausage	45	0.2	1.0	10	119.0534858453521	74.38265271562973	0.06496129179704345	0.050959238220606065
Sausage	45	0.2	1.0	11	145.75286769865647	88.33705090520183	0.2539892593984985	0.16174086364026266
Sausage	45	0.2	1.0	12	199.58012090966065	129.35862708964186	0.1618711674326032	0.1022796323052814
Sausage	45	0.4	2.0	1	213.04628043075832	162.4140296833379	0.4530762804091709	0.4318632147677878
Sausage	45	0.4	2.0	2	219.8262968990079	165.09782011798245	0.4304147866005637	0.4032692322742815
Sausage	45	0.4	2.0	3	256.740034245853	202.87982363135134	0.2636136857540531	0.17632964958926714
Sausage	45	0.4	2.0	4	253.82670129089763	201.97199386658778	0.25949907964678026	0.2516988874922684
Sausage	45	0.4	2.0	5	204.4222162821292	152.91496967170448	0.44483417187424096	0.3999358540477953
Sausage	45	0.4	2.0	6	85.71269270778161	62.631207060381136	0.07530907959988925	0.057724806650962475
Sausage	45	0.4	2.0	7	121.76367753053692	85.99190436797065	0.06667129078614067	0.06083564797883066
Sausage	45	0.4	2.0	8	91.35805390163807	64.52443754122771	0.05968763216755463	0.030112108063933437
Sausage	45	0.4	2.0	9	94.15296992700384	66.88388422490596	0.07928324978209411	0.05618705857087849
Sausage	45	0.4	2.0	10	101.92387167383212	71.71352880487592	0.11353375475500505	0.06653440495957216
Sausage	45	0.4	2.0	11	120.85387067688205	84.77932648712479	0.1188844699833082	0.1024869642852722
Sausage	45	0.4	2.0	12	97.08508225221455	66.16891363985522	0.14755566378680127	0.1143392967346348
Sausage	45	0.4	1.0	1	191.62376933608292	143.8919245731188	0.3749321015859615	0.30795153962577954
Sausage	45	0.4	1.0	2	245.7112278588929	181.01044461802852	0.6341565322509535	0.5287860660348318
Sausage	45	0.4	1.0	3	230.3134715127676	173.02786910723137	0.3892449952078777	0.3326834105153755
Sausage	45	0.4	1.0	4	227.4742871199391	171.54868451259995	0.5172549211226447	0.4407225829519997
Sausage	45	0.4	1.0	5	239.9231651676158	184.4955853402829	0.5967687229156947	0.518860699160667
Sausage	45	0.4	1.0	6	221.46249700858112	166.19150351461403	0.4887192065008197	0.39984988784025466
Sausage	45	0.4	1.0	7	220.99116360430122	168.46492737047367	0.3001077968309184	0.24351362790823444
Sausage	45	0.4	1.0	8	188.86768583289404	140.1396750838791	0.27299343124493164	0.18913310666835728
Sausage	45	0.4	1.0	9	244.560147676283	184.23966127321532	0.4028533472340931	0.3342697135916556
Sausage	45	0.4	1.0	10	230.59998196585065	175.66685659208133	0.285809907952456	0.2428399377739199
Sausage	45	0.4	1.0	11	122.65224035044267	87.65948276484045	0.30647866306420546	0.23959880229668795
Sausage	45	0.4	1.0	12	118.2145429712038	82.51417056009237	0.2836294607037893	0.22369873328001302
Edam_cheese	0	0.06	2.0	1	61.88269147418657	250.29698715647652	0.14597645443472282	0.004491423675884047
Edam_cheese	0	0.06	2.0	2	64.37958941891297	17.58513117705801	0.1558611318038925	0.009216884927922504
Edam_cheese	0	0.06	2.0	3	77.89805149212796	-107.7186974954448	0.19321164689030174	0.011714812708974785
Edam_cheese	0	0.06	2.0	4	56.02547036679717	-279.3014015030208	0.1215369557244952	0.005939261609059079
Edam_cheese	0	0.06	2.0	5	76.84878287575225	88.84925860097881	0.19238415834470665	0.006526456941480685
Edam_cheese	0	0.06	2.0	6	72.84776078680034	150.97859633755013	0.17104384314140042	0.0054784603522107355
Edam_cheese	0	0.06	2.0	7	61.84325144630806	303.4541525542921	0.14364119148627674	0.0065707847053019615
Edam_cheese	0	0.06	2.0	8	49.40294658628508	167.51845624154572	0.1040086301753353	0.0029437382410254717
Edam_cheese	0	0.06	2.0	9	66.45584308499207	332.328366897158	0.1487645149725742	0.006531814361922086
Edam_cheese	0	0.06	2.0	10	59.824915629831246	295.4279186246377	0.1327663623334072	0.0043670771445402795
Edam_cheese	0	0.06	2.0	11	85.44473698810192	0.40446356514191584	0.2495763260362869	0.016206614756143455
Edam_cheese	0	0.06	2.0	12	68.26127396618338	-495.2064493715586	0.17250445279652252	0.02448061441957636
Edam_cheese	0	0.06	1.0	1	43.019300476685274	155.03060683994983	0.07969101653574197	0.003983795972866104
Edam_cheese	0	0.06	1.0	2	38.73056781330336	-54.73791938265953	0.0766305743782288	0.002027544607245021
Edam_cheese	0	0.06	1.0	3	58.573651913341436	301.05252287583414	0.12959795711829902	0.006128960224160495
Edam_cheese	0	0.06	1.0	4	48.31844796267993	123.56735140087916	0.10177338542951417	0.002556535924238827
Edam_cheese	0	0.06	1.0	5	56.51272335047919	351.6295129273164	0.12390450791841433	0.00407899448669811
Edam_cheese	0	0.06	1.0	6	54.55734757011632	199.19633142185856	0.11527149040608	0.0025775237071651155
Edam_cheese	0	0.06	1.0	7	46.14460528915393	289.83657971394047	0.10244469222474813	0.007146397687280101
Edam_cheese	0	0.06	1.0	8	43.401366151144316	381.1160880467792	0.09783822586197423	0.007205609526402534
Edam_cheese	0	0.06	1.0	9	59.51006914033164	143.49415131295729	0.13717188244344733	0.005496919851620608
Edam_cheese	0	0.06	1.0	10	58.334020449658105	168.26414144635328	0.12728437512691393	0.004670574253775546
Edam_cheese	0	0.06	1.0	11	44.4962760124836	276.61824950300667	0.08554825009128163	0.005199240115417689
Edam_cheese	0	0.06	1.0	12	46.55290402675974	192.45888954795655	0.09771859590740024	0.0030035763440758923
Edam_cheese	0	0.1	2.0	1	103.74558618681256	597.5839073443651	0.2457871093633244	0.015353191565222604
Edam_cheese	0	0.1	2.0	2	84.06290147870482	356.1619355669524	0.1943543428901779	0.0072707528170432535
Edam_cheese	0	0.1	2.0	3	97.46548988380738	323.59027827986165	0.20295532814851736	0.0047795937094467595
Edam_cheese	0	0.1	2.0	4	90.69869366449844	195.01286527189413	0.19462612431553025	0.003773694753680321
Edam_cheese	0	0.1	2.0	5	71.8215788200322	237.19573539531436	0.1482521336891129	0.0026671171331464068
Edam_cheese	0	0.1	2.0	6	71.91930072906219	-21.74019060363977	0.15418448101372448	0.006532103226796942
Edam_cheese	0	0.1	2.0	7	93.48015106961986	63.18459640923195	0.20051498589011496	0.001779051454978757
Edam_cheese	0	0.1	2.0	8	86.62775466083369	352.60252371708293	0.18320363854316127	0.005234015072411888
Edam_cheese	0	0.1	2.0	9	92.69808130550737	291.7070171786491	0.19816736665122253	0.006674568966532044
Edam_cheese	0	0.1	2.0	10	92.60349691458042	208.03395099075735	0.21135855251852803	0.004071106946599933
Edam_cheese	0	0.1	2.0	11	104.82301419877487	442.32774666807023	0.2314683399997457	0.012629424187923791
Edam_cheese	0	0.1	2.0	12	84.08712943828122	252.42448347960433	0.18008466817362345	0.010658808979342273
Edam_cheese	0	0.1	1.0	1	89.1093602858892	334.689142020165	0.1891031506503243	0.004570191724170944
Edam_cheese	0	0.1	1.0	2	70.96292162413864	418.5234113019111	0.1423020853248546	0.007122901432383899
Edam_cheese	0	0.1	1.0	3	81.93226161699899	232.02844271700073	0.14994668885307794	0.0072273848895979785
Edam_cheese	0	0.1	1.0	4	63.80500874655752	208.55045559775527	0.11604115195902524	0.004604055179033355
Edam_cheese	0	0.1	1.0	5	74.93683436205635	36.49884164164559	0.1530892088035257	0.006550593009485608
Edam_cheese	0	0.1	1.0	6	56.5397467357339	-53.28066885791	0.11217199167039714	0.0021740761946423453
Edam_cheese	0	0.1	1.0	7	96.49645571671124	-151.74001042104393	0.218904376047844	0.014269471022436015
Edam_cheese	0	0.1	1.0	8	77.16694480223362	191.5221801712316	0.16372739795114474	0.0020368035496972033
Edam_cheese	0	0.1	1.0	9	91.00636392936192	170.662521958509	0.20112868556310204	0.0130234200700546
Edam_cheese	0	0.1	1.0	10	77.70130515069829	264.34618696052905	0.1678960471639116	0.011583743348838587
Edam_cheese	0	0.1	1.0	11	69.06098372018832	-46.297642622725085	0.12892915785626144	0.00384022769127
Edam_cheese	0	0.1	1.0	12	56.22555818631098	-147.51923221904426	0.1070421606827075	0.009836889022142869
Edam_cheese	0	0.2	2.0	1	101.66637516830907	-27.94874142619873	0.2790301053906308	0.00795088538596443
Edam_cheese	0	0.2	2.0	2	81.39567676589662	96.80401811669697	0.2091507944795332	0.004536585039574411
Edam_cheese	0	0.2	2.0	3	99.93614136274076	583.8598303408628	0.2787357104552325	0.015836705221788497
Edam_cheese	0	0.2	2.0	4	86.08093348145613	473.8223781749714	0.22381564165722084	0.005920275951085135
Edam_cheese	0	0.2	2.0	5	109.70685474870467	612.1964411099615	0.33252675348820304	0.020314372576860168
Edam_cheese	0	0.2	2.0	6	105.06171140799093	1030.9476705255724	0.289813186034018	0.024446790402749063
Edam_cheese	0	0.2	2.0	7	126.72361086395401	64.86109273652569	0.3858540741841919	0.007944799369998154
Edam_cheese	0	0.2	2.0	8	122.31043421563196	220.53126350733154	0.3429447980035702	0.005383866154797031
Edam_cheese	0	0.2	2.0	9	130.63511420319122	342.4616641076191	0.3718187943951313	0.006706012580508519
Edam_cheese	0	0.2	2.0	10	119.10061996330353	529.4607862535755	0.33467542060151084	0.01648790331053503
Edam_cheese	0	0.2	2.0	11	121.2969925421694	-387.3381552158029	0.3407223284239361	0.006778492410721706
Edam_cheese	0	0.2	2.0	12	113.94406799410076	26.031380816166212	0.3209900920007109	0.0060879807212590115
Edam_cheese	0	0.2	1.0	1	112.13999239639304	220.2605814909224	0.2894945056522014	0.004872049853016064
Edam_cheese	0	0.2	1.0	2	90.5886962844743	-20.9849269093656	0.24307843149152025	0.0038109973551439897
Edam_cheese	0	0.2	1.0	3	110.03669652553376	552.7301226131867	0.3166466318312029	0.008764275624002255
Edam_cheese	0	0.2	1.0	4	106.27265512364515	284.4623833764716	0.2688835949444707	0.0031447276847210754
Edam_cheese	0	0.2	1.0	5	105.08191773246216	555.1674647622406	0.2850905010297241	0.00609037520774977
Edam_cheese	0	0.2	1.0	6	108.3020578533782	181.2974070430724	0.3067782575909819	0.011770716515816649
Edam_cheese	0	0.2	1.0	7	89.41546049739732	-154.91798113905355	0.2573491677622024	0.01679661088867407
Edam_cheese	0	0.2	1.0	8	90.78278342120826	336.75233146616665	0.2448256039753806	0.00978729439654647
Edam_cheese	0	0.2	1.0	9	91.5201367546346	536.0912911279609	0.2405843999499835	0.015742553073953187
Edam_cheese	0	0.2	1.0	10	84.85915171242664	255.80959430932793	0.21346341446083034	0.005859601155484207
Edam_cheese	0	0.2	1.0	11	90.75287965843447	30.67539885514003	0.22405866856344075	0.0037891385685419705
Edam_cheese	0	0.2	1.0	12	87.97990815549356	462.9399830986722	0.2149949241446444	0.010965583987156418
Edam_cheese	0	0.4	2.0	1	261.69057194623656	-618.3846830753248	0.7097883403090219	0.011601326436816998
Edam_cheese	0	0.4	2.0	2	238.6606179339784	-473.8386251879178	0.6913592732483962	0.014239288084599412
Edam_cheese	0	0.4	2.0	3	236.04535905903825	109.99787427965512	0.6248019049128648	0.019239686909679674
Edam_cheese	0	0.4	2.0	4	234.41392054396135	-585.3089193374498	0.6330704252096679	0.009251043602882763
Edam_cheese	0	0.4	2.0	5	257.8860718979211	516.6568430227595	0.7170110113029722	0.010723639822186222
Edam_cheese	0	0.4	2.0	6	221.0885027712992	-455.40676353438295	0.6584372851298274	0.008821120325190042
Edam_cheese	0	0.4	2.0	7	254.63371597708246	130.18431357414534	0.741164539878837	0.01910782390768924
Edam_cheese	0	0.4	2.0	8	241.49361579507504	233.98638861546164	0.6760459679840061	0.01619699980347328
Edam_cheese	0	0.4	2.0	9	211.03935513107587	183.9355522803753	0.6004055920616508	0.033701442380371566
Edam_cheese	0	0.4	2.0	10	206.21379063343514	1475.0744300756505	0.6069661586874674	0.05146115236839794
Edam_cheese	0	0.4	2.0	11	271.005885659704	415.82646408091773	0.7867595992360131	0.017808013328745015
Edam_cheese	0	0.4	2.0	12	248.4643144992497	791.9789521263733	0.6803443034298295	0.03432675751301216
Edam_cheese	0	0.4	1.0	1	165.41998007645066	180.1439865411223	0.4493775346806361	0.014160403744935837
Edam_cheese	0	0.4	1.0	2	145.5565067568456	689.3371013417493	0.3812000101897367	0.018987150135174217
Edam_cheese	0	0.4	1.0	3	180.60600048136442	366.6691993020881	0.4777196247615901	0.02015449459715764
Edam_cheese	0	0.4	1.0	4	147.94417376116527	27.247806515099516	0.4687131577166366	0.013928288831207879
Edam_cheese	0	0.4	1.0	5	224.2773996447182	-190.8130672157159	0.6214454946031441	0.014633934396557488
Edam_cheese	0	0.4	1.0	6	185.54536912568406	147.3688445638074	0.5439270305577225	0.01986070746724149
Edam_cheese	0	0.4	1.0	7	204.15240627080243	-289.00835312026663	0.57328652268388	0.017191158615516403
Edam_cheese	0	0.4	1.0	8	161.6862453323549	-19.628942251678026	0.44347281866654215	0.013988590030183424
Edam_cheese	0	0.4	1.0	9	206.8744385194977	-98.98179048857924	0.5654726233749782	0.009495373007538863
Edam_cheese	0	0.4	1.0	10	190.19919148126485	228.85718779739176	0.4971300343973433	0.023532769021753167
Edam_cheese	0	0.4	1.0	11	211.0008572356389	66.28742930870278	0.5667640234688001	0.01010770032804352
Edam_cheese	0	0.4	1.0	12	199.37462825719595	-170.8652075061331	0.5924398153694892	0.014397199193153796
Edam_cheese	30	0.06	2.0	1	51.30150979980144	39.1487915358469	0.05394274375996642	0.015558730029804013
Edam_cheese	30	0.06	2.0	2	51.452953110190485	38.7090550523009	0.054098144714912436	0.019535796968530583
Edam_cheese	30	0.06	2.0	3	55.193990583700256	42.28439155486724	0.057585937106540815	0.015276481075203975
Edam_cheese	30	0.06	2.0	4	66.77288430453618	51.19190793437582	0.05978847785070341	0.019325009042805853
Edam_cheese	30	0.06	2.0	5	64.09134555824672	49.95718551539186	0.05082473005978288	0.015089027689285843
Edam_cheese	30	0.06	2.0	6	78.31946509986282	60.69337499011409	0.05178333913246912	0.042233793850108566
Edam_cheese	30	0.06	2.0	7	66.16314017228731	50.06026226702861	0.048430834427267484	0.035719377747205905
Edam_cheese	30	0.06	2.0	8	62.730133595562535	48.51300206096792	0.04778336653364432	0.021785500043068482
Edam_cheese	30	0.06	2.0	9	71.22200800124877	55.27411294779666	0.041840047720051315	0.024657790546582303
Edam_cheese	30	0.06	2.0	10	64.45183098960872	49.887893636759586	0.05113706128733802	0.022953065571831185
Edam_cheese	30	0.06	2.0	11	70.91174186077613	54.17663711205478	0.050178397976475136	0.02157836678227248
Edam_cheese	30	0.06	2.0	12	60.30323673729604	45.05146591356053	0.030215568710278706	0.023959080083091992
Edam_cheese	30	0.06	1.0	1	62.88315906845775	48.80391133223926	0.05356777293626902	0.014763352390367468
Edam_cheese	30	0.06	1.0	2	51.23806580955099	39.16035524299346	0.055965924330482086	0.01633261462526094
Edam_cheese	30	0.06	1.0	3	47.75615394882688	35.24328386450576	0.06595364200626354	0.01865575776009978
Edam_cheese	30	0.06	1.0	4	46.79946122813925	35.08369400548182	0.0445300338308138	0.01392055734688988
Edam_cheese	30	0.06	1.0	5	54.94595948718054	41.510488497597365	0.05550912530190294	0.014388263113787646
Edam_cheese	30	0.06	1.0	6	52.003627010707284	39.90765043588041	0.04247454905697527	0.013370494898575605
Edam_cheese	30	0.06	1.0	7	51.86120549848693	38.89446905771218	0.047242659611119536	0.013770685434515616
Edam_cheese	30	0.06	1.0	8	46.83364222104108	35.489963267009244	0.032500994853997316	0.012273344006757949
Edam_cheese	30	0.06	1.0	9	69.20718340336998	53.778552747316986	0.05881909706393858	0.015615613338467404
Edam_cheese	30	0.06	1.0	10	64.3423668549368	49.2735427979429	0.02812461259171717	0.01574553946025514
Edam_cheese	30	0.06	1.0	11	45.911114792048274	32.03958013218456	0.0323595587906202	0.013040150707347264
Edam_cheese	30	0.06	1.0	12	45.61661764526315	34.225153202251136	0.024425819199529814	0.010490861921843996
Edam_cheese	30	0.1	2.0	1	82.92934381807909	58.64841726790145	0.05875241958575508	0.035152263103200174
Edam_cheese	30	0.1	2.0	2	71.95959430932649	51.4785941433026	0.07103864606376957	0.02260115534819446
Edam_cheese	30	0.1	2.0	3	109.2955096278589	83.47228617159642	0.06822244297759893	0.06363534736099682
Edam_cheese	30	0.1	2.0	4	98.92590507626576	77.62417669645095	0.10509971701292542	0.052160990005628516
Edam_cheese	30	0.1	2.0	5	91.87466459098943	68.9517344562043	0.03318797049344446	0.03763608322159295
Edam_cheese	30	0.1	2.0	6	83.09603069275512	62.99760021366732	0.0269386860041713	0.028171829711646244
Edam_cheese	30	0.1	2.0	7	82.61349886321557	62.998503075626374	0.05136266158280682	0.03487732739512618
Edam_cheese	30	0.1	2.0	8	83.71875897038647	64.92097571604266	0.0616254030963667	0.029272909248475133
Edam_cheese	30	0.1	2.0	9	105.3663158564128	80.95391339695284	0.06431766689905427	0.05600106122671837
Edam_cheese	30	0.1	2.0	10	108.80055299204427	85.1821318238483	0.0568247080322697	0.05143069901650855
Edam_cheese	30	0.1	2.0	11	92.6305419335252	71.45570998840756	0.06925377104814744	0.03592444832424276
Edam_cheese	30	0.1	2.0	12	105.05107606242302	84.17767099338442	0.08662427588351257	0.03181558067760872
Edam_cheese	30	0.1	1.0	1	85.01139906122853	66.47889976702933	0.034848959193071315	0.016808187843717983
Edam_cheese	30	0.1	1.0	2	69.39071386182079	53.805485559711656	0.07177690372195396	0.026748605645058817
Edam_cheese	30	0.1	1.0	3	81.97672838339717	64.18284556094412	0.03092398011022405	0.013086289475361586
Edam_cheese	30	0.1	1.0	4	72.33180425188357	56.49683953634891	0.03864264735874209	0.01637690783502489
Edam_cheese	30	0.1	1.0	5	81.76566451169165	61.707378419521824	0.06647031160145953	0.020473365597338467
Edam_cheese	30	0.1	1.0	6	85.4226680896998	65.23540872819609	0.05171560182932716	0.02305217092958061
Edam_cheese	30	0.1	1.0	7	74.45569691566523	57.0922941331067	0.0480397052773836	0.01934543678719915
Edam_cheese	30	0.1	1.0	8	78.2815495613352	61.11500491017306	0.049625300448578984	0.03341650118291869
Edam_cheese	30	0.1	1.0	9	62.72150603428997	46.537455570624495	0.03532766996180072	0.021010636239726252
Edam_cheese	30	0.1	1.0	10	55.02538928938137	41.13093722028967	0.04151500376314679	0.014555214619287769
Edam_cheese	30	0.1	1.0	11	63.01209148813135	46.52270011831368	0.05247244213491032	0.03146112662372014
Edam_cheese	30	0.1	1.0	12	55.32494479731305	41.72848233417933	0.04505009494862696	0.015591774276739431
Edam_cheese	30	0.2	2.0	1	148.02289566534367	117.07315199283408	0.07241553952967411	0.07395398663682498
Edam_cheese	30	0.2	2.0	2	125.15207626801175	91.96185208796348	0.06515157450596876	0.06204937847075776
Edam_cheese	30	0.2	2.0	3	159.7837507579497	124.0162125756562	0.08429179208226399	0.07966394822445386
Edam_cheese	30	0.2	2.0	4	129.86096008177557	101.24589740992552	0.06453080791560628	0.05949005479786765
Edam_cheese	30	0.2	2.0	5	144.81510684085225	113.81901906821106	0.08217896896835354	0.07723517541619172
Edam_cheese	30	0.2	2.0	6	130.88337982698144	101.34718194530328	0.05443404110298823	0.06866286144826983
Edam_cheese	30	0.2	2.0	7	149.1304965325733	106.8126124887347	0.05250232439858664	0.08883011246035055
Edam_cheese	30	0.2	2.0	8	135.72846618844315	106.02349049790884	0.04663045753663048	0.057032361995469925
Edam_cheese	30	0.2	2.0	9	154.1849695556609	121.35328487170665	0.042458344591440704	0.06344404249813204
Edam_cheese	30	0.2	2.0	10	153.75322286388933	121.79659547693088	0.055058747855722574	0.09890521038733603
Edam_cheese	30	0.2	2.0	11	149.73454846274134	115.37096547713455	0.0637656870270708	0.0861535731055368
Edam_cheese	30	0.2	2.0	12	142.87948747616667	101.89560144503336	0.11446308012067785	0.1205536743996038
Edam_cheese	30	0.2	1.0	1	100.04212631449523	76.57447574404726	0.08194158621907055	0.061430519843273565
Edam_cheese	30	0.2	1.0	2	70.9374188586045	50.33792477216882	0.043328317974209024	0.04155446338373596
Edam_cheese	30	0.2	1.0	3	95.6387861614731	71.31726144064629	0.05836441279714849	0.05051416229839194
Edam_cheese	30	0.2	1.0	4	97.6480205739628	75.39721802073586	0.03825389956662672	0.0388653327716309
Edam_cheese	30	0.2	1.0	5	98.40474627269492	68.321919837225	0.07089642169152274	0.048682240326641375
Edam_cheese	30	0.2	1.0	6	98.61345522178593	76.3935829757157	0.032976605984163146	0.03062269858140688
Edam_cheese	30	0.2	1.0	7	109.84498860138856	85.33719739596353	0.0972958938261249	0.03167186379299576
Edam_cheese	30	0.2	1.0	8	110.52588870675378	82.83100055911922	0.07355155853518454	0.031405285609522327
Edam_cheese	30	0.2	1.0	9	107.48992319832756	79.70702643470545	0.035626668051234836	0.050561418038119914
Edam_cheese	30	0.2	1.0	10	127.33958007223892	100.24960633707087	0.048803212448913585	0.048240740879995136
Edam_cheese	30	0.2	1.0	11	112.04846114989606	87.99079320687125	0.034931751271955934	0.033570469700226264
Edam_cheese	30	0.2	1.0	12	121.45405537086027	89.39785054487982	0.06798001155169542	0.06571749638942205
Edam_cheese	30	0.4	2.0	1	226.67647090664445	160.63397012615383	0.2331622128439345	0.16795450815990814
Edam_cheese	30	0.4	2.0	2	222.68460938474234	176.7327602784236	0.14864708222583528	0.10937261836231416
Edam_cheese	30	0.4	2.0	3	273.1873766911144	214.84773909425425	0.20110836601939205	0.14787836626322484
Edam_cheese	30	0.4	2.0	4	244.23145980237197	189.20755945152658	0.15287076643788364	0.14048725441758164
Edam_cheese	30	0.4	2.0	5	276.59768653380854	214.695725187768	0.17849138507050386	0.14380948383713196
Edam_cheese	30	0.4	2.0	6	218.7073273439848	166.66785816368474	0.21515192275498896	0.1288094962487468
Edam_cheese	30	0.4	2.0	7	210.9507405684388	158.72356179664098	0.1654274181640025	0.07757614975959451
Edam_cheese	30	0.4	2.0	8	205.47510913271927	152.82763041835003	0.1509411785834103	0.10572936471314606
Edam_cheese	30	0.4	2.0	9	217.1052680245293	160.43132426985403	0.12838026749877912	0.08938594403149808
Edam_cheese	30	0.4	2.0	10	211.35997656881005	162.77256347702266	0.13172477213963296	0.08676014994745809
Edam_cheese	30	0.4	2.0	11	269.3402508892877	203.93364116779955	0.19583745672400607	0.1573488783575181
Edam_cheese	30	0.4	2.0	12	233.6491145840528	180.3632950690715	0.15891938749166862	0.11442218285370832
Edam_cheese	30	0.4	1.0	1	149.7023298149539	111.21130409482964	0.09225400221730952	0.04269325173326585
Edam_cheese	30	0.4	1.0	2	139.148228879988	103.49025657376082	0.08689390965947863	0.051101154064421735
Edam_cheese	30	0.4	1.0	3	159.6778565931287	119.79055006056109	0.09720550228151466	0.0470231929157332
Edam_cheese	30	0.4	1.0	4	150.28652299237174	113.21241987748233	0.1269190182744687	0.053704450787655726
Edam_cheese	30	0.4	1.0	5	199.42438757289347	138.7467104386722	0.09904933801024772	0.07797841010175231
Edam_cheese	30	0.4	1.0	6	180.22490125005925	122.22651358815105	0.1063008375549753	0.06962139601696653
Edam_cheese	30	0.4	1.0	7	171.6692050278284	130.03767935191212	0.15026165481322218	0.06642774938031239
Edam_cheese	30	0.4	1.0	8	156.8330379771296	110.09153852893402	0.08488309637379406	0.054568700720018494
Edam_cheese	30	0.4	1.0	9	200.0644897944579	153.42532336836447	0.16264909943503514	0.08644293562510137
Edam_cheese	30	0.4	1.0	10	186.382578224641	127.94739772422662	0.08802732517440442	0.09856713107969213
Edam_cheese	30	0.4	1.0	11	219.3731863853832	170.22314661091127	0.07829336261231203	0.046898393453099436
Edam_cheese	30	0.4	1.0	12	186.83509426777127	143.54407137371595	0.11729674245015025	0.05165183907753329
Edam_cheese	45	0.06	2.0	1	60.56593935907437	41.63881621290771	0.05457293740162543	0.02248048002367686
Edam_cheese	45	0.06	2.0	2	58.362088386092275	41.42271783762681	0.03884352820432476	0.024164938233680242
Edam_cheese	45	0.06	2.0	3	58.60481177686519	41.06777223883391	0.04621740918424056	0.025019175670493117
Edam_cheese	45	0.06	2.0	4	66.11160163903601	46.354383865968686	0.029893953885767877	0.0375464608299463
Edam_cheese	45	0.06	2.0	5	65.55116721128051	45.70428057695656	0.04786443768876241	0.044120796913977314
Edam_cheese	45	0.06	2.0	6	54.2646875259399	38.73320572805486	0.0796588233438284	0.03667432854761984
Edam_cheese	45	0.06	2.0	7	67.63701222082203	47.83235211039818	0.04356289221510945	0.034369026403012384
Edam_cheese	45	0.06	2.0	8	56.14227226825906	39.67957729945553	0.06733184757436092	0.032954114966777935
Edam_cheese	45	0.06	2.0	9	71.98618366570958	53.07807356998984	0.08184325802059618	0.032184358244193474
Edam_cheese	45	0.06	2.0	10	66.7079793724264	49.085595889799364	0.0977037110546831	0.046751489128644505
Edam_cheese	45	0.06	2.0	11	85.37782762473164	62.63711950445894	0.03940017379313362	0.03926200357388007
Edam_cheese	45	0.06	2.0	12	65.77462876523175	46.34343458648761	0.053443978737655766	0.02010770845422785
Edam_cheese	45	0.06	1.0	1	55.879347957273815	39.81294460972449	0.04211326560835575	0.01654214974732675
Edam_cheese	45	0.06	1.0	2	56.29404950945191	40.1903128350803	0.013383538275557256	0.02271328809503879
Edam_cheese	45	0.06	1.0	3	53.26754098549059	36.53706663990547	0.02546262781031116	0.01946788275633861
Edam_cheese	45	0.06	1.0	4	44.180419056739275	30.68193273387485	0.04814493544172462	0.02470194686648202
Edam_cheese	45	0.06	1.0	5	46.881804796639	32.241757655076505	0.06443089195422079	0.036570750516537125
Edam_cheese	45	0.06	1.0	6	38.942577988432895	26.67453178753177	0.08490920842639632	0.04560936459867087
Edam_cheese	45	0.06	1.0	7	65.42046613661437	46.670610964767874	0.04975938659223482	0.02523757892606775
Edam_cheese	45	0.06	1.0	8	59.52410779425274	42.281207724286716	0.049152189046603095	0.021363897623866077
Edam_cheese	45	0.06	1.0	9	52.656382856465704	37.142136385709	0.0460169917859706	0.019762621385642876
Edam_cheese	45	0.06	1.0	10	52.38569858013268	37.366594798181715	0.029653067656334024	0.01782946461229441
Edam_cheese	45	0.06	1.0	11	56.4415519069125	39.0638582307503	0.03987085066295104	0.021986116715231586
Edam_cheese	45	0.06	1.0	12	50.710883555262335	35.84302400028571	0.02974774273306398	0.01625414872536857
Edam_cheese	45	0.1	2.0	1	78.72185192300863	55.45782871396196	0.059583693669229186	0.02832965294954704
Edam_cheese	45	0.1	2.0	2	71.11483918151598	50.51555564378962	0.03677581074911642	0.022672489822714303
Edam_cheese	45	0.1	2.0	3	108.81751481757748	79.48539413480167	0.04050283145401396	0.03382157749623844
Edam_cheese	45	0.1	2.0	4	104.27822057687	76.00448740897787	0.032169523878660934	0.04557302415355803
Edam_cheese	45	0.1	2.0	5	104.93458439241944	76.90759553724602	0.06207614376965913	0.033339266068385616
Edam_cheese	45	0.1	2.0	6	94.41732025466453	69.40937885812669	0.0573283064081131	0.02656786097438247
Edam_cheese	45	0.1	2.0	7	94.4140854650405	68.25681892415551	0.06111330045754521	0.026714279927099325
Edam_cheese	45	0.1	2.0	8	79.85822172716757	57.61841944757539	0.06721184500725065	0.024595349511226383
Edam_cheese	45	0.1	2.0	9	71.25192560336377	50.04816491931528	0.08675005366723719	0.042250800816725706
Edam_cheese	45	0.1	2.0	10	76.09561559967685	55.874514392902654	0.08084631854698568	0.03325558873888237
Edam_cheese	45	0.1	2.0	11	101.09528765713479	71.91487009374163	0.046589153019594536	0.040906511389090655
Edam_cheese	45	0.1	2.0	12	85.94754505646708	62.29883709230541	0.06903850583299558	0.022143084011418398
Edam_cheese	45	0.1	1.0	1	74.84351964223849	53.50634782186719	0.041888811805515416	0.028188326239105395
Edam_cheese	45	0.1	1.0	2	81.70526791760723	59.52297078284662	0.031794248919751064	0.042937936796799116
Edam_cheese	45	0.1	1.0	3	89.44067191222243	64.97030098804568	0.05516743326393257	0.04538521309887597
Edam_cheese	45	0.1	1.0	4	76.88620666928584	55.742922976906144	0.028492623165936967	0.03052217193480314
Edam_cheese	45	0.1	1.0	5	75.96176839370798	53.27923974989677	0.04278096576393491	0.018781540715755538
Edam_cheese	45	0.1	1.0	6	61.375407385420125	41.792301836062386	0.051655557444419006	0.030935389415045693
Edam_cheese	45	0.1	1.0	7	81.5330249012197	58.7815851683592	0.06601534431573453	0.04340325142966623
Edam_cheese	45	0.1	1.0	8	79.96219865000162	58.49470217257058	0.030272014029775567	0.019713343259980053
Edam_cheese	45	0.1	1.0	9	85.85707816763637	62.04340884244914	0.09651495427606517	0.04785345895254467
Edam_cheese	45	0.1	1.0	10	76.23273029218642	55.07351007928053	0.054776819710952204	0.030530797033016557
Edam_cheese	45	0.1	1.0	11	75.76737606101895	52.81488886235122	0.0503512451647802	0.0327706950142035
Edam_cheese	45	0.1	1.0	12	75.59014669900037	54.737657358418936	0.05262972534176152	0.0234361575224827
Edam_cheese	45	0.2	2.0	1	126.30403490864312	92.16789418489076	0.07257713608248148	0.04023726689409587
Edam_cheese	45	0.2	2.0	2	138.34400036868487	106.88774492537816	0.12503443351031068	0.04608643890811805
Edam_cheese	45	0.2	2.0	3	125.18881161674528	91.40393338538624	0.0417604966259663	0.0771862492785932
Edam_cheese	45	0.2	2.0	4	120.88609215631352	90.2847291626748	0.060862113036595986	0.03515439858129447
Edam_cheese	45	0.2	2.0	5	134.97708820172994	99.8271171343959	0.060730082454956535	0.1079776636749736
Edam_cheese	45	0.2	2.0	6	114.410185128815	84.1063219781385	0.048591715586457286	0.0511720920028418
Edam_cheese	45	0.2	2.0	7	118.15488544761475	86.81203528928837	0.07636816747124117	0.06973258549529078
Edam_cheese	45	0.2	2.0	8	131.09168369309225	98.81210330534692	0.04971630644185437	0.06374662221694226
Edam_cheese	45	0.2	2.0	9	128.5389371006621	84.6845407653063	0.11109805583995233	0.04293474960305799
Edam_cheese	45	0.2	2.0	10	111.89578474847606	80.70042170269618	0.04203407430521661	0.0766664081946517
Edam_cheese	45	0.2	2.0	11	124.92629590680328	90.5910817637324	0.05333490060093186	0.06110275832888594
Edam_cheese	45	0.2	2.0	12	119.80782836163878	88.35994598491055	0.057064627817212464	0.07760690306887573
Edam_cheese	45	0.2	1.0	1	106.85528129359216	78.33512803900398	0.032726464382669115	0.04510483027957268
Edam_cheese	45	0.2	1.0	2	102.04097568777236	75.99315101856214	0.032711757385621806	0.05148616218348215
Edam_cheese	45	0.2	1.0	3	96.23008679258301	70.30716875309533	0.049652314670731744	0.04248469312972557
Edam_cheese	45	0.2	1.0	4	98.13815266640337	73.3061166269664	0.04237458614439275	0.03972586197442245
Edam_cheese	45	0.2	1.0	5	123.2647950934857	91.0978508563187	0.0830682302589179	0.04464026924072981
Edam_cheese	45	0.2	1.0	6	109.60935888001043	79.57853543761433	0.059735876351319085	0.05229686738527338
Edam_cheese	45	0.2	1.0	7	87.11768013837059	62.27731651981008	0.04746621874486757	0.04178820886822277
Edam_cheese	45	0.2	1.0	8	135.42630481887997	95.1134988410906	0.03681486199260485	0.07310225922200314
Edam_cheese	45	0.2	1.0	9	102.02953418399527	75.13134745192923	0.04881466876252212	0.051374174129010734
Edam_cheese	45	0.2	1.0	10	99.06336573847614	74.16186239147845	0.03529394824591972	0.036674250633408366
Edam_cheese	45	0.2	1.0	11	123.64817308352495	84.30524454242224	0.0481206114568851	0.08143721880212894
Edam_cheese	45	0.2	1.0	12	102.13519797306614	74.75404570287522	0.038908480009678004	0.034307818773699844
Edam_cheese	45	0.4	2.0	1	258.600210533879	186.76939789801287	0.3558336304440852	0.3538834850547415
Edam_cheese	45	0.4	2.0	2	244.46918931022964	180.36400015375608	0.14733032599388576	0.18299747447629786
Edam_cheese	45	0.4	2.0	3	236.1824896752257	165.92058076284604	0.1978725119717807	0.20840569251860566
Edam_cheese	45	0.4	2.0	4	221.3290881291724	159.12742395522454	0.1300359725611024	0.11557052247758877
Edam_cheese	45	0.4	2.0	5	249.96915113295358	155.18735251384274	0.16386289299586745	0.17694994057805002
Edam_cheese	45	0.4	2.0	6	212.88018641103446	151.33507391338173	0.17217260716656033	0.19450702032875108
Edam_cheese	45	0.4	2.0	7	295.23178441273456	216.6183266916981	0.18009356231409088	0.20451457949437896
Edam_cheese	45	0.4	2.0	8	279.44510239992593	208.87034995438685	0.15847557572805007	0.13500603829497498
Edam_cheese	45	0.4	2.0	9	303.8895392564453	218.7761010525233	0.17290208201816	0.23960832331387186
Edam_cheese	45	0.4	2.0	10	258.0032137538939	189.1251715146619	0.11970864187754413	0.12855043457161058
Edam_cheese	45	0.4	2.0	11	270.3797307825692	195.55680808891705	0.14964020733719793	0.13684168695228718
Edam_cheese	45	0.4	2.0	12	264.8610337984169	190.0533171309662	0.1989514850201912	0.2357068380554883
Edam_cheese	45	0.4	1.0	1	241.81916076946686	178.7558239176811	0.11085925634468333	0.10465668401436364
Edam_cheese	45	0.4	1.0	2	197.82716401453206	144.48788659116988	0.07963062238345497	0.07029937197775563
Edam_cheese	45	0.4	1.0	3	206.9888894009083	135.62658836590697	0.0934370873627828	0.0785995136421522
Edam_cheese	45	0.4	1.0	4	222.03839466697485	168.03965929431445	0.14303138215689198	0.13061368000828089
Edam_cheese	45	0.4	1.0	5	233.25441845781762	172.5721512465306	0.1496626472777102	0.11143019634434173
Edam_cheese	45	0.4	1.0	6	202.6204164516544	149.1142568761544	0.16773039310630444	0.1586666342199414
Edam_cheese	45	0.4	1.0	7	254.8047936662118	192.2967197640568	0.2550713856179618	0.228502486599956
Edam_cheese	45	0.4	1.0	8	202.40557906750038	146.41480879163146	0.14119303204192515	0.1373683970745325
Edam_cheese	45	0.4	1.0	9	236.1701861438915	175.19305310398494	0.12134332548295695	0.12736902830032562
Edam_cheese	45	0.4	1.0	10	208.91079143353366	152.59998595969287	0.1575913258443853	0.15565988086482022
Edam_cheese	45	0.4	1.0	11	240.12546430495019	176.76731839186874	0.09951972104013496	0.0811247981750951
Edam_cheese	45	0.4	1.0	12	231.0416058676689	169.43599916925555	0.14866064513457633	0.1454894357346652
Leberkaese	0	0.06	2.0	1	84.33224100141669	-111.5627104943126	0.33543660309113593	0.012006918576292788
Leberkaese	0	0.06	2.0	2	45.744399316393036	162.77862836075775	0.14022118050684915	0.004823808442161271
Leberkaese	0	0.06	2.0	3	64.86177450513242	-143.612834321047	0.24567130321734795	0.005212286530913433
Leberkaese	0	0.06	2.0	4	78.40614785643574	-754.7896208968756	0.3727031494291001	0.020257359700916338
Leberkaese	0	0.06	2.0	5	93.69194881953624	675.0734759276936	0.3810609239555749	0.00857307841021408
Leberkaese	0	0.06	2.0	6	46.736555753337065	128.35069915190206	0.14577537994807382	0.003190039010103045
Leberkaese	0	0.06	2.0	7	91.43108014496764	361.33215441663737	0.3812829430019185	0.012440709423044028
Leberkaese	0	0.06	2.0	8	85.39694383350194	-264.5171796173713	0.35617453191418186	0.01694308842281642
Leberkaese	0	0.06	2.0	9	81.86325959193839	238.3712902769253	0.3343948025198905	0.011497064934872724
Leberkaese	0	0.06	2.0	10	56.057251579818335	-14.734117090833454	0.2079294686175361	0.0043123463574630755
Leberkaese	0	0.06	2.0	11	77.56578028506544	-66.06844962808279	0.3085114444263065	0.006143371171466682
Leberkaese	0	0.06	2.0	12	49.94644380099903	281.26507072633444	0.1774977921157604	0.005876542302043071
Leberkaese	0	0.06	1.0	1	76.80316541132892	853.9067851627901	0.2950064775614452	0.017553392831528715
Leberkaese	0	0.06	1.0	2	61.06380011007695	217.9626317146608	0.2383426350542256	0.009164673915120105
Leberkaese	0	0.06	1.0	3	46.3206285087787	59.60630505159922	0.1553172485194674	0.004756192923827596
Leberkaese	0	0.06	1.0	4	99.50306147107591	588.0111122491352	0.41832613832467697	0.017615404786262827
Leberkaese	0	0.06	1.0	5	75.43884833781877	975.1016632285205	0.3086588270601167	0.011270249970491492
Leberkaese	0	0.06	1.0	6	78.98331528559255	-49.2032979293584	0.32560595745399146	0.015239792987493029
Leberkaese	0	0.06	1.0	7	41.9633313485332	-493.8589214553703	0.13131817097242968	0.018714271738223976
Leberkaese	0	0.06	1.0	8	55.08986518220155	-86.20736199054801	0.2056376366433673	0.011744661791190469
Leberkaese	0	0.06	1.0	9	73.8862000697793	-608.4442107035744	0.3020413606578701	0.018433025161514426
Leberkaese	0	0.06	1.0	10	72.31004620325021	943.0943485188236	0.2700698303082803	0.014965362042974648
Leberkaese	0	0.06	1.0	11	98.05343489132956	518.2507127346998	0.4469175566386802	0.02170967287756776
Leberkaese	0	0.06	1.0	12	61.24966349295001	1430.6635638682217	0.26644362149367873	0.026334657586946145
Leberkaese	0	0.06	1.0	13	86.46141858455869	1401.2256789785995	0.3686423303769745	0.026350190566941892
Leberkaese	0	0.1	2.0	1	91.82558162998556	135.04437753156125	0.310306040951402	0.03488984922191931
Leberkaese	0	0.1	2.0	2	52.452059293880524	468.4826194839217	0.1659611783289001	0.008364780325023363
Leberkaese	0	0.1	2.0	3	101.29827622787137	831.6021042379183	0.4200045730560505	0.012814193288407254
Leberkaese	0	0.1	2.0	4	65.83763551506182	793.6238985313228	0.22095994452162854	0.009316084811217994
Leberkaese	0	0.1	2.0	5	105.86611346933984	397.1807834412721	0.3987543411492204	0.008697579774247418
Leberkaese	0	0.1	2.0	6	62.42760914692658	511.84360902153423	0.21051221515033808	0.00555831754591687
Leberkaese	0	0.1	2.0	7	59.403160314712586	-63.446751388916425	0.17400545918795768	0.006646952869880432
Leberkaese	0	0.1	2.0	8	93.32658309354235	1165.1040416121564	0.3448092249854179	0.03298984640339407
Leberkaese	0	0.1	2.0	9	65.57320666022088	336.89829323802894	0.21751763434597848	0.004815825862272815
Leberkaese	0	0.1	2.0	10	97.26927440066302	-24.249515765179446	0.3589469598690803	0.011150643285893096
Leberkaese	0	0.1	2.0	11	64.76387984312571	-334.4331847821217	0.2333246235002462	0.008110126021178677
Leberkaese	0	0.1	2.0	12	40.036237305018226	84.6506057575934	0.11489246364647808	0.003246433822402357
Leberkaese	0	0.1	1.0	1	83.58813244879927	141.79233242176824	0.29922677502411715	0.007323276560201757
Leberkaese	0	0.1	1.0	2	60.98424484389973	187.745031860712	0.2056229609230633	0.008178454861528841
Leberkaese	0	0.1	1.0	3	57.19041429811367	771.5059371086454	0.1826948748847282	0.010096786307115605
Leberkaese	0	0.1	1.0	4	86.53931193209586	856.1179446253947	0.33047170076794496	0.018021318606245573
Leberkaese	0	0.1	1.0	5	42.756919915897086	432.04141410209	0.13672141700194548	0.006636121212581017
Leberkaese	0	0.1	1.0	6	93.42901029635043	566.7398260268408	0.38999943006698096	0.018144005419064226
Leberkaese	0	0.1	1.0	7	95.58659575341788	692.7976113657675	0.3729183689094801	0.022694851312877413
Leberkaese	0	0.1	1.0	8	56.20195513314128	203.4402390383214	0.1856193527506948	0.006066920512697209
Leberkaese	0	0.1	1.0	9	63.33836244794132	296.8813381664046	0.20480866480349988	0.01159964608171397
Leberkaese	0	0.1	1.0	10	102.12891259421244	91.93548886311098	0.4014918384980416	0.0067765781213895634
Leberkaese	0	0.1	1.0	11	94.66065684311987	566.9399788185492	0.34132725723587776	0.013558645463867279
Leberkaese	0	0.1	1.0	12	50.36546552553012	313.24415485058756	0.15029652847688474	0.01110420961589424
Leberkaese	0	0.2	2.0	1	98.66271815842987	191.98246351199415	0.39207501807875744	0.0072122151329520705
Leberkaese	0	0.2	2.0	2	93.11203707054692	160.07350066857913	0.3283766430421695	0.005976095459275986
Leberkaese	0	0.2	2.0	3	81.03589821137922	67.80216800901154	0.282139788076674	0.008004679100924119
Leberkaese	0	0.2	2.0	4	64.58128797004115	-156.48343080223475	0.2371207478127022	0.00567692133634525
Leberkaese	0	0.2	2.0	5	85.61968014379448	168.5458951580891	0.2898879305185536	0.0054908142302855
Leberkaese	0	0.2	2.0	6	106.3529861226753	1239.5292173564112	0.4185446127784923	0.02340605613404325
Leberkaese	0	0.2	2.0	7	90.59010121805989	917.6463367392712	0.3463230748789734	0.015932454548199526
Leberkaese	0	0.2	2.0	8	79.24731458575678	348.6723115174822	0.2740366047522945	0.006145022902972382
Leberkaese	0	0.2	2.0	9	85.33494089824856	950.0186452478872	0.28881204706614483	0.019139084740896824
Leberkaese	0	0.2	2.0	10	78.65897165227187	535.9385513557579	0.2748131398573456	0.014573860826579462
Leberkaese	0	0.2	2.0	11	69.4966639375938	606.9275313454374	0.229895952538044	0.01903326555227276
Leberkaese	0	0.2	2.0	12	60.512014119281424	538.0372767871615	0.22126865458100886	0.013969241447049674
Leberkaese	0	0.2	1.0	1	84.08226920725804	149.09250116373903	0.28836712563214884	0.0063965962339831315
Leberkaese	0	0.2	1.0	2	57.78766729301443	9.042907591255478	0.19707415283809904	0.0057666492715388856
Leberkaese	0	0.2	1.0	3	78.40295388965023	882.285479085797	0.25632478155703503	0.016172307065674192
Leberkaese	0	0.2	1.0	4	58.43217554610591	360.2036483586606	0.1781257423865139	0.007073139625424825
Leberkaese	0	0.2	1.0	5	86.87681228000488	511.9654619437668	0.293047096806069	0.014061440253073156
Leberkaese	0	0.2	1.0	6	74.79000503302277	-143.0273130618382	0.2369267289511013	0.010005677722682993
Leberkaese	0	0.2	1.0	7	53.43610975035412	336.3324171157486	0.17438626473004734	0.007166839342869606
Leberkaese	0	0.2	1.0	8	73.58798452675661	367.78780862650785	0.2543502803201386	0.010213851476509708
Leberkaese	0	0.2	1.0	9	56.3698415063702	300.06103149810605	0.15728421656647232	0.0037599264692020134
Leberkaese	0	0.2	1.0	10	76.64717080055281	412.64487390645616	0.2804632829736167	0.016204926907862884
Leberkaese	0	0.2	1.0	11	72.7221299103974	201.8234901956895	0.2351272104823669	0.007211945826971816
Leberkaese	0	0.2	1.0	12	61.13284949354414	-45.75323034644585	0.20320198191839572	0.005694609737483717
Leberkaese	0	0.4	2.0	1	114.67227174831918	868.1563933372375	0.3842249205965073	0.023051166354629504
Leberkaese	0	0.4	2.0	2	85.48502971285038	463.492136330491	0.261645316435068	0.007690542568790925
Leberkaese	0	0.4	2.0	3	101.82585849219195	24.77487646033616	0.3012136623487148	0.015973194047411363
Leberkaese	0	0.4	2.0	4	115.72810154523805	926.3512599263753	0.4258038777527722	0.0336436024791533
Leberkaese	0	0.4	2.0	5	63.05251334442838	257.4848352080553	0.20341217412168966	0.006994348019290121
Leberkaese	0	0.4	2.0	6	78.7405559136612	351.27086994259207	0.2709297981844673	0.008997260052402659
Leberkaese	0	0.4	2.0	7	80.89764240898644	130.0322088819137	0.2609560513401645	0.0057986803793229295
Leberkaese	0	0.4	2.0	8	99.98696165775434	370.90453221393784	0.3428417610450047	0.007045311193708566
Leberkaese	0	0.4	2.0	9	70.3138867694988	156.8673871178631	0.2140156699710224	0.008077219177888766
Leberkaese	0	0.4	2.0	10	101.36855825229581	534.9939721901566	0.3278700245029104	0.011386544517076174
Leberkaese	0	0.4	2.0	11	83.44329766427755	45.195033753268234	0.2542747850919453	0.005038402927249694
Leberkaese	0	0.4	2.0	12	101.24903625449792	1.108226243942432	0.3616064481064494	0.0065449037257834155
Leberkaese	0	0.4	1.0	1	91.69629104037793	299.02996916033356	0.2774639359930653	0.008365830201706715
Leberkaese	0	0.4	1.0	2	105.51593709800278	147.26635970295686	0.3788945478036528	0.010807026841463679
Leberkaese	0	0.4	1.0	3	117.72231732961693	374.89876520646095	0.4046201570814244	0.009224424528307736
Leberkaese	0	0.4	1.0	4	91.38766726674665	109.90094336685121	0.2896350137809481	0.006846824180127881
Leberkaese	0	0.4	1.0	5	103.32245884454667	164.95470032229994	0.34299890984352915	0.005445844484537824
Leberkaese	0	0.4	1.0	6	99.7450584198521	282.0632742896645	0.3497456700466055	0.010183315062567692
Leberkaese	0	0.4	1.0	7	100.66608882926633	461.4792098160749	0.3604641020311064	0.0071020997005816575
Leberkaese	0	0.4	1.0	8	126.0977465301617	596.2550430785143	0.5054022458130026	0.015478904454139356
Leberkaese	0	0.4	1.0	9	104.16305169869952	85.13880819546621	0.3769600565939225	0.01343021147501354
Leberkaese	0	0.4	1.0	10	69.09071642134789	94.37466065997158	0.19393463514755868	0.003313631139965721
Leberkaese	0	0.4	1.0	11	79.58044198552999	537.7680423598244	0.2878061960592537	0.01440448781583264
Leberkaese	0	0.4	1.0	12	110.02447541930937	144.23584029009334	0.39474078628054987	0.00819607392070372
Leberkaese	30	0.06	2.0	1	97.79254787702659	60.129366838703355	0.09292824411760099	0.04955103977622994
Leberkaese	30	0.06	2.0	2	62.84573098026561	40.60233303360312	0.14491983938149866	0.036415988970797133
Leberkaese	30	0.06	2.0	3	125.48159263004108	77.53983057951817	0.1786651295842596	0.06850779410983687
Leberkaese	30	0.06	2.0	4	69.59904567731635	44.98158690711372	0.12293908330991347	0.044468608783236566
Leberkaese	30	0.06	2.0	5	117.83139517489055	78.2839171481309	0.13657894217639488	0.04589365511938626
Leberkaese	30	0.06	2.0	6	73.93797607324024	48.94489185084539	0.12147549405192155	0.03297782756561271
Leberkaese	30	0.06	2.0	7	115.61490977729645	70.02239003992287	0.1937694503993522	0.07805557770657864
Leberkaese	30	0.06	2.0	8	71.02132552856564	45.1602671941813	0.10411704303868294	0.04097028578375665
Leberkaese	30	0.06	2.0	9	62.33795935684169	40.91519967218763	0.12605470079679995	0.031261492012261326
Leberkaese	30	0.06	2.0	10	121.26387827032354	80.83667220616451	0.17126411171945755	0.048698131352470635
Leberkaese	30	0.06	2.0	11	86.30798556282721	56.78630928155256	0.08087821572076045	0.0375727105854398
Leberkaese	30	0.06	2.0	12	49.149926041222685	32.879504024690526	0.07751167517315115	0.018837734310729028
Leberkaese	30	0.06	1.0	1	116.21708201113573	76.26558279735897	0.1556332319466353	0.04935583676275638
Leberkaese	30	0.06	1.0	2	76.6007166140763	46.30239740443716	0.10149207516191386	0.023303082889775967
Leberkaese	30	0.06	1.0	3	101.53031515959724	67.53569583466239	0.1244163842064768	0.042540989047055784
Leberkaese	30	0.06	1.0	4	82.20135873217018	52.30022163363944	0.08458660233529537	0.024153360674960333
Leberkaese	30	0.06	1.0	5	79.64311551436863	51.109945219168715	0.1388380902027265	0.03950039468627445
Leberkaese	30	0.06	1.0	6	131.9649915036274	78.79092167045359	0.16480933974529316	0.06285311557203348
Leberkaese	30	0.06	1.0	7	57.39766104574592	36.22598077471064	0.0901025927649214	0.027130241387586476
Leberkaese	30	0.06	1.0	8	94.74177584805962	59.480107389461324	0.14052883229032356	0.04304766802495555
Leberkaese	30	0.06	1.0	9	101.92375095234877	65.44891204951674	0.0937995786774396	0.03215816399170126
Leberkaese	30	0.06	1.0	10	69.70204087884737	42.81770241225605	0.12500571408836295	0.03716824987981435
Leberkaese	30	0.06	1.0	11	69.03900319229568	44.64688020287586	0.08958991763795368	0.026303831674740142
Leberkaese	30	0.06	1.0	12	113.80152365228473	69.6807525178388	0.1641742173371612	0.04147437888135179
Leberkaese	30	0.1	2.0	1	89.67337475343875	64.95232057645828	0.13612609245961554	0.04271171694366418
Leberkaese	30	0.1	2.0	2	87.41073112938963	61.02083109092527	0.1622813241398008	0.05414106490676258
Leberkaese	30	0.1	2.0	3	102.7336607124278	75.56775069347778	0.09891165796216753	0.043843141844537435
Leberkaese	30	0.1	2.0	4	56.14036955840788	41.30997193310792	0.09002574562780916	0.033156757817014174
Leberkaese	30	0.1	2.0	5	103.16181848608707	74.97934471185029	0.1599357439984683	0.04834055976141341
Leberkaese	30	0.1	2.0	6	53.03985205336146	39.12177107661616	0.11343451175700968	0.04189958669769837
Leberkaese	30	0.1	2.0	7	102.9836302014994	73.23550522323814	0.15902571402005758	0.061344423138671715
Leberkaese	30	0.1	2.0	8	57.053432625356336	41.19210418429414	0.09023610452402883	0.028339456864328167
Leberkaese	30	0.1	2.0	9	91.3918126653729	60.58583323473851	0.15609339855336565	0.05381668751899262
Leberkaese	30	0.1	2.0	10	52.66388241015312	38.865715450981604	0.08220376259643508	0.03150118418354714
Leberkaese	30	0.1	2.0	11	50.856292938994926	38.71396262146496	0.11210192280893108	0.036734354654579485
Leberkaese	30	0.1	2.0	12	59.58963761572554	42.963162295314596	0.1296405549829465	0.0425442946615382
Leberkaese	30	0.1	1.0	1	52.62405554006113	36.748935124943834	0.10737919929731243	0.03805569583563618
Leberkaese	30	0.1	1.0	2	109.67092679625951	74.01732421902453	0.11133208381249092	0.05434072730636137
Leberkaese	30	0.1	1.0	3	56.787868147584526	39.33911361486843	0.06911375082769118	0.02704854052182189
Leberkaese	30	0.1	1.0	4	84.0978601964072	54.41068681145779	0.15828748868458165	0.052141454579715585
Leberkaese	30	0.1	1.0	5	67.40008786693274	46.001145933396046	0.13441769907300907	0.04084643066655221
Leberkaese	30	0.1	1.0	6	122.63353770892516	82.88903414410119	0.204502483033508	0.07810097061275846
Leberkaese	30	0.1	1.0	7	116.46572413927666	79.99382232475448	0.1701230887851892	0.0608736855594302
Leberkaese	30	0.1	1.0	8	64.20280425569774	44.49553235771212	0.11508649138361116	0.0354814454697136
Leberkaese	30	0.1	1.0	9	88.39117757160463	63.33827286098316	0.12195870029681075	0.040408549055150025
Leberkaese	30	0.1	1.0	10	59.818485951931756	41.90148954406987	0.11992917279396036	0.04251941563383036
Leberkaese	30	0.1	1.0	11	51.8642238475479	38.439821763840136	0.09774582323900928	0.03635212174912748
Leberkaese	30	0.1	1.0	12	86.63921613166382	60.191660863151725	0.13374066017830244	0.03963415281348707
Leberkaese	30	0.2	2.0	1	95.39202984675907	78.60657485259624	0.10706289431818004	0.06616468812205581
Leberkaese	30	0.2	2.0	2	70.45833609604173	57.850568716650585	0.12321625803863985	0.05369138559563332
Leberkaese	30	0.2	2.0	3	76.16987771688966	64.43511057618242	0.17295207561177614	0.059655889882311276
Leberkaese	30	0.2	2.0	4	64.03098081845393	53.41607227853466	0.07363236842868334	0.03417244449812115
Leberkaese	30	0.2	2.0	5	74.62474729834538	60.3938463997749	0.11684875561468812	0.04603906111408921
Leberkaese	30	0.2	2.0	6	105.8065572489395	87.87722910369058	0.09690663824439448	0.0497494033329719
Leberkaese	30	0.2	2.0	7	64.06072793131425	53.368058362838575	0.08293045320934167	0.03328518627196659
Leberkaese	30	0.2	2.0	8	73.07106077242169	61.780191172487754	0.1288270590189527	0.04859916013283752
Leberkaese	30	0.2	2.0	9	80.64711159952195	68.04123351970851	0.10338800187610216	0.03404698807912966
Leberkaese	30	0.2	2.0	10	97.26925235272496	78.57337678618967	0.10883204300919476	0.05634376744989721
Leberkaese	30	0.2	2.0	11	118.83782385215495	97.99026647291628	0.11664312765059755	0.0742560574554945
Leberkaese	30	0.2	2.0	12	63.14657427077902	51.54916472972554	0.0546800652677376	0.037002815352753834
Leberkaese	30	0.2	1.0	1	92.86469804031572	78.28825578843868	0.09636823516230666	0.059577708493370574
Leberkaese	30	0.2	1.0	2	64.12203540222892	53.02019021687458	0.0865363049912721	0.03732335655065723
Leberkaese	30	0.2	1.0	3	79.85220576074902	64.98345617406844	0.0897410674932552	0.05800822767185504
Leberkaese	30	0.2	1.0	4	101.80442551633624	84.698370952824	0.13291921232949733	0.06420837438337429
Leberkaese	30	0.2	1.0	5	79.1837325730794	65.44768156352633	0.09908155567281583	0.04316912327491999
Leberkaese	30	0.2	1.0	6	101.49521370887983	83.47100733913221	0.12844704472439336	0.0634282778917294
Leberkaese	30	0.2	1.0	7	102.51935554725712	85.87000312027298	0.1882842930173047	0.07625282659082334
Leberkaese	30	0.2	1.0	8	76.11430442068715	61.417617684700275	0.10870642884530156	0.04397598355885489
Leberkaese	30	0.2	1.0	9	96.48276167442202	76.38274375800765	0.0935222064499208	0.0523049969244135
Leberkaese	30	0.2	1.0	10	72.42461326619498	57.97282678859319	0.08704503875079994	0.03805927455462643
Leberkaese	30	0.2	1.0	11	118.68121490015015	98.73819287165547	0.09634295099841256	0.06110937848298896
Leberkaese	30	0.2	1.0	12	86.46116272408055	69.38857678027628	0.10286321815006537	0.06333047600703212
Leberkaese	30	0.4	2.0	1	107.64795520455564	97.23764957413728	0.15454412798859188	0.0776446920532285
Leberkaese	30	0.4	2.0	2	121.90797212029756	112.95701791864138	0.16397447091843176	0.09501075100449696
Leberkaese	30	0.4	2.0	3	95.31011720048284	86.93087851188655	0.13615189832792246	0.07310481214300739
Leberkaese	30	0.4	2.0	4	119.92248329564902	111.323503648655	0.1674503497432613	0.09612895743925064
Leberkaese	30	0.4	2.0	5	104.70084824306288	97.52891229692104	0.14544396593794245	0.05317637793129767
Leberkaese	30	0.4	2.0	6	105.8071898458452	98.87894428705519	0.13197300024725725	0.07544292736273303
Leberkaese	30	0.4	2.0	7	102.1612035091174	95.16522845285192	0.1320190230540438	0.07126775509774834
Leberkaese	30	0.4	2.0	8	61.428376916741364	55.47400011094034	0.09624132585161682	0.03443162368773444
Leberkaese	30	0.4	2.0	9	123.76380875766161	114.92901131960052	0.1035166193689834	0.05067515604899138
Leberkaese	30	0.4	2.0	10	111.40527282649195	100.69338731939644	0.2809458978559565	0.10780452207920034
Leberkaese	30	0.4	2.0	11	99.57864874019783	89.5587719022239	0.12045863379960425	0.09236327814744387
Leberkaese	30	0.4	2.0	12	133.32785206123515	124.72103524628996	0.1605192398160576	0.09462213141296567
Leberkaese	30	0.4	1.0	1	112.76689665055673	103.99071849643042	0.153648840900819	0.0774474533658363
Leberkaese	30	0.4	1.0	2	90.33544171939518	82.46188092711256	0.08237555671094393	0.0463973937631517
Leberkaese	30	0.4	1.0	3	98.24375435851168	91.6068979433712	0.1273615419592002	0.05960071778591935
Leberkaese	30	0.4	1.0	4	80.72032598511252	73.32696618703484	0.1333335783926263	0.06810308899061024
Leberkaese	30	0.4	1.0	5	109.62454496714501	101.79077071220247	0.1952877136516004	0.1009524056104766
Leberkaese	30	0.4	1.0	6	85.31534617871534	79.07821737437045	0.20528471589746947	0.1033020339814845
Leberkaese	30	0.4	1.0	7	72.32285053984019	66.587275249216	0.07507204290938703	0.0366846680890788
Leberkaese	30	0.4	1.0	8	102.03009064873517	95.57206235117702	0.17593053201185124	0.08199433899213268
Leberkaese	30	0.4	1.0	9	100.6166956725532	93.49284932100261	0.2009343398568546	0.09374683656698336
Leberkaese	30	0.4	1.0	10	113.61384022292037	104.68270073121072	0.17982752383753914	0.0952640931573384
Leberkaese	30	0.4	1.0	11	138.10906835108327	127.47637779462501	0.3200823687192072	0.16297250362673438
Leberkaese	30	0.4	1.0	12	120.19679963233695	110.97868651058435	0.2654786634533721	0.1218808870290441
Leberkaese	45	0.06	2.0	1	67.30147552590546	43.20061518130424	0.08131338694431121	0.03899961046825931
Leberkaese	45	0.06	2.0	2	129.291681419229	81.45645709778272	0.15494488453920172	0.08766206245143808
Leberkaese	45	0.06	2.0	3	63.06406521335907	40.9100855107741	0.07739148184478299	0.03872103356292037
Leberkaese	45	0.06	2.0	4	130.08613809254103	81.52091447449112	0.17137571175873914	0.14417193648090126
Leberkaese	45	0.06	2.0	5	101.62557157993616	63.76463781212474	0.1006503191063353	0.07769496722990171
Leberkaese	45	0.06	2.0	6	69.25899987230575	43.69660283829704	0.09617492247779576	0.04715432619386934
Leberkaese	45	0.06	2.0	7	79.41021208619206	50.52759712842555	0.10584870270601077	0.056705386512669015
Leberkaese	45	0.06	2.0	8	69.19439725335677	43.00181654564477	0.11457312429046712	0.08291322139631079
Leberkaese	45	0.06	2.0	9	105.64215925904548	66.5194309669112	0.10885160700324176	0.05038620334414312
Leberkaese	45	0.06	2.0	10	60.95271408653458	40.89854967336674	0.0809518026468241	0.041161154344251716
Leberkaese	45	0.06	2.0	11	115.6573915565958	76.2284084435534	0.153371522088835	0.059668068221799465
Leberkaese	45	0.06	2.0	12	100.5922585889228	66.00096456682166	0.12161799771434573	0.06709338464568149
Leberkaese	45	0.06	1.0	1	104.75063692287223	62.76023902436396	0.1528232239492162	0.08108884537670273
Leberkaese	45	0.06	1.0	2	55.766199723533816	33.415771665175605	0.06736726508716594	0.028580456680245912
Leberkaese	45	0.06	1.0	3	129.9392162894268	85.22980958975054	0.12134241033809925	0.06333518959798295
Leberkaese	45	0.06	1.0	4	75.8587028641935	45.66706506197324	0.2024290972368312	0.099672314096511
Leberkaese	45	0.06	1.0	5	64.04109018775979	40.95612340837392	0.13395785621128042	0.06787403445923387
Leberkaese	45	0.06	1.0	6	86.4216083347996	54.9777303384339	0.1862834924175448	0.09367202717876584
Leberkaese	45	0.06	1.0	7	113.83743242273226	73.03265294912786	0.11568459349895363	0.06707147704870907
Leberkaese	45	0.06	1.0	8	66.80973910634229	42.43002974185087	0.09339373074325387	0.05155816115411814
Leberkaese	45	0.06	1.0	9	61.639665483845015	39.97071541091086	0.1279923013128709	0.06930065986998989
Leberkaese	45	0.06	1.0	10	104.212783293334	66.40082999232092	0.16427924655853934	0.08873514977596
Leberkaese	45	0.06	1.0	11	80.33575153060995	48.449449761624685	0.10936094699867717	0.07602692978482921
Leberkaese	45	0.06	1.0	12	113.9863939894244	71.84782691700511	0.07313749647207958	0.04986598294515309
Leberkaese	45	0.1	2.0	1	50.25420713052806	35.190647621702915	0.09628743665882007	0.05243032084351438
Leberkaese	45	0.1	2.0	2	102.92524821179832	73.12088512879801	0.18615671152453	0.09319147995022843
Leberkaese	45	0.1	2.0	3	94.67374116879346	65.71963818676383	0.10530801762151216	0.07958190819416965
Leberkaese	45	0.1	2.0	4	72.91648958506647	50.96445736596967	0.1239985550143713	0.07195564299081687
Leberkaese	45	0.1	2.0	5	66.60854415415196	47.17091883894544	0.11127850723790944	0.06277246246799283
Leberkaese	45	0.1	2.0	6	135.02454719142335	97.11356892893168	0.1217221826155486	0.0784739867015498
Leberkaese	45	0.1	2.0	7	57.6890978269253	42.9502109627734	0.12397609174274266	0.07483315597674288
Leberkaese	45	0.1	2.0	8	106.09241963208483	75.36133318274072	0.13275636473259905	0.07490627360751012
Leberkaese	45	0.1	2.0	9	117.29918385852379	84.1477227168029	0.1080527415085109	0.06470436092950534
Leberkaese	45	0.1	2.0	10	62.987985481790325	45.89690687174222	0.1203996504777417	0.06934878644876917
Leberkaese	45	0.1	2.0	11	46.7086926973977	35.35805508263305	0.07468105634790664	0.04675929754107272
Leberkaese	45	0.1	2.0	12	77.72236184799489	56.88157883388403	0.17275960453486516	0.09684645614082596
Leberkaese	45	0.1	1.0	1	54.42280035024523	36.730524284148416	0.07559373058202114	0.04217542472918636
Leberkaese	45	0.1	1.0	2	86.97523196145305	54.48726222887129	0.07984380763189787	0.0439314476029418
Leberkaese	45	0.1	1.0	3	58.56620532027936	37.60909641247926	0.06559019320779902	0.03809521238738687
Leberkaese	45	0.1	1.0	4	71.06471512284783	46.54131070556864	0.0785104268348701	0.04675725965495209
Leberkaese	45	0.1	1.0	5	108.27295330814809	71.38179935715802	0.12137133234622186	0.09628493516825673
Leberkaese	45	0.1	1.0	6	114.40876380514058	79.16007561895988	0.13051944271211333	0.07702428280905832
Leberkaese	45	0.1	1.0	7	64.99420168605558	42.789208351397875	0.07574456304677858	0.04294893844033725
Leberkaese	45	0.1	1.0	8	113.57764389542726	79.1181922630853	0.08104033233317925	0.06079003318176334
Leberkaese	45	0.1	1.0	9	56.51358723137176	38.04586456260273	0.08282340233708793	0.048284328876849525
Leberkaese	45	0.1	1.0	10	105.17388189323464	72.68111930087348	0.19980485112697108	0.1113100880358429
Leberkaese	45	0.1	1.0	11	52.335950366651105	35.72905038200446	0.093701998404127	0.05616678732582822
Leberkaese	45	0.1	1.0	12	90.71883506144327	61.049207408045014	0.0922777515616725	0.0748062340452267
Leberkaese	45	0.1	1.0	13	138.05745796892901	93.97581806587348	0.1449518038934318	0.09972475122755932
Leberkaese	45	0.2	2.0	1	73.31533819622922	62.90883374004391	0.15762998710901566	0.1139005866850542
Leberkaese	45	0.2	2.0	2	100.65889044777792	83.49310615644636	0.09554887088683396	0.09724125663841672
Leberkaese	45	0.2	2.0	3	106.00931568291932	87.89244555611575	0.13609323646705526	0.13116157363185554
Leberkaese	45	0.2	2.0	4	57.91658133448754	46.773877555348335	0.06703697439352264	0.05173286226155925
Leberkaese	45	0.2	2.0	5	106.1868115727151	89.3048394282308	0.10160356390941007	0.06321182920847998
Leberkaese	45	0.2	2.0	6	64.2093465393091	53.24543759236167	0.10749610067157443	0.07668646602498913
Leberkaese	45	0.2	2.0	7	93.49182917687016	78.31277849020549	0.12698544933546507	0.07389208138385255
Leberkaese	45	0.2	2.0	8	72.44661701063762	58.775868190585705	0.06254707530188802	0.04855943216271489
Leberkaese	45	0.2	2.0	9	88.19934349453479	73.57059765520266	0.08402120577141826	0.05968338805173923
Leberkaese	45	0.2	2.0	10	106.98021243450434	88.77262756043908	0.12839796698982595	0.09797325427087317
Leberkaese	45	0.2	2.0	11	98.44230332550752	83.0252577270702	0.12603356026178425	0.09479777656024588
Leberkaese	45	0.2	2.0	12	78.44255799641682	64.96179289672683	0.08743587652962305	0.047518781453829866
Leberkaese	45	0.2	1.0	1	110.74988089713686	91.50512475250471	0.10433123910324443	0.09145848576332274
Leberkaese	45	0.2	1.0	2	87.34757494885255	69.94622701800444	0.06050323087430254	0.06763936721395299
Leberkaese	45	0.2	1.0	3	114.71344865398935	93.8901895462273	0.10007522792936203	0.07269228239840053
Leberkaese	45	0.2	1.0	4	56.586324102275476	45.626805263465165	0.07516235270859828	0.051758401189667236
Leberkaese	45	0.2	1.0	5	93.58957070220768	77.36379394635271	0.10564809477625167	0.07237570441237727
Leberkaese	45	0.2	1.0	6	110.34526036925293	91.28133649303668	0.08363273939257101	0.06628315136088075
Leberkaese	45	0.2	1.0	7	108.3863299116567	89.75446192570152	0.07533736101151997	0.07121050467329805
Leberkaese	45	0.2	1.0	8	96.4198807273059	76.39382904278135	0.09099372114033448	0.0810652514036391
Leberkaese	45	0.2	1.0	9	85.44154129895065	68.81356304833513	0.10478595555725627	0.0858425425695424
Leberkaese	45	0.2	1.0	10	96.73542656504523	78.93042315587311	0.08380651241033299	0.06415360841951989
Leberkaese	45	0.2	1.0	11	76.58293991180042	62.71593851269261	0.09617088363974656	0.06655973149720586
Leberkaese	45	0.2	1.0	12	57.253533272397505	44.99999648461177	0.04593589070951233	0.03811923779876464
Leberkaese	45	0.4	2.0	1	92.03944906274785	83.63385397552743	0.11594315544559736	0.07449527119982441
Leberkaese	45	0.4	2.0	2	76.02033674158649	68.88443176779975	0.0877465936589018	0.06566988812939678
Leberkaese	45	0.4	2.0	3	128.97148308616607	116.83513675642368	0.11076827772026923	0.1309675157909212
Leberkaese	45	0.4	2.0	4	88.80892139395358	79.20115904302675	0.05598645909954099	0.05750899157972601
Leberkaese	45	0.4	2.0	5	124.26285911814153	113.29344619499378	0.1567649420497048	0.12017414870236
Leberkaese	45	0.4	2.0	6	77.95612914015746	69.56964283496735	0.11402700583777915	0.07900625176570329
Leberkaese	45	0.4	2.0	7	84.22266147003793	74.87643821605525	0.106927670641101	0.0860122853080249
Leberkaese	45	0.4	2.0	8	119.7393406474659	106.37842176235526	0.09651760733252616	0.08651523119730972
Leberkaese	45	0.4	2.0	9	82.72080682861578	72.37097156180484	0.0677768657771181	0.058885006499695663
Leberkaese	45	0.4	2.0	10	81.26375592803413	71.65846466953289	0.09313307999349142	0.06572025366799293
Leberkaese	45	0.4	2.0	11	112.10511414527677	101.30748300425564	0.09139467928763494	0.07305689986879786
Leberkaese	45	0.4	2.0	12	78.2343361240037	70.99606595858731	0.0920590503691636	0.06223058431300685
Leberkaese	45	0.4	1.0	1	135.86572587793918	123.13934491117826	0.12750780208675494	0.12431528997909708
Leberkaese	45	0.4	1.0	2	80.86944444096305	70.73191674431068	0.10779037374616413	0.08148781225035867
Leberkaese	45	0.4	1.0	3	80.19322180874305	72.42197489454973	0.06332325903221532	0.048474067407496615
Leberkaese	45	0.4	1.0	4	84.82781467104543	76.09453853592417	0.10536181248062154	0.09413967958199927
Leberkaese	45	0.4	1.0	5	69.61223138098048	62.02329210653061	0.10878203325743237	0.08651977520638532
Leberkaese	45	0.4	1.0	6	93.29431953229617	83.95532423708976	0.12450743803834845	0.09753939508751673
Leberkaese	45	0.4	1.0	7	100.53830369816285	89.84999052066422	0.18797310353708835	0.15733335472500162
Leberkaese	45	0.4	1.0	8	90.37612549940384	80.84312393064181	0.09465523538990056	0.08033673599858067
Leberkaese	45	0.4	1.0	9	129.37925702840656	116.26114397532784	0.1069319111013314	0.09416585723951176
Leberkaese	45	0.4	1.0	10	130.86179959273147	117.1551317450054	0.13399757494023498	0.13824132697738506
Leberkaese	45	0.4	1.0	11	119.55547619132932	108.00571302453693	0.09545919633737236	0.07455412154115232
Leberkaese	45	0.4	1.0	12	81.29223789074877	71.70768593305314	0.08692491462758661	0.06303239166045012
